# Supplementary material for: Solute exchange through gap junctions lessens the adverse effects of inactivating mutations in metabolite-handling genes
Source: eLife. 2022 Sep 15;11:e78425. doi: 10.7554/eLife.78425 (PMC9534548; doi:10.7554/eLife.78425)
Supplement: Figure 1—source data 1. [file elife-78425-fig1-data1.xlsx]

## Sheet: expression data
	RER (1=neg)	colony morphology	APC JW	Bcatenin JW	BRAF JW	KRAS JW	P53 JW	PIK3CA JW	GJA1	GJA10	GJA3	GJA3	GJA4	GJA4	GJA5	GJA5	GJA8	GJA9	GJB1	GJB2	GJB3	GJB3	GJB3	GJB4	GJB5	GJB6	GJC1	GJC1	GJC1	GJC1	GJC2	GJC2	GJD2	GJD3	GJD3	GJD4
C10	1	1	0.942125	1.14444	1.16046	1.03853	2.00277	1.09228	4295.17	21.4484	81.5487	16.4507	34.1213	20.7348	17.4246	10.1415	63.3323	28.2375	81.7337	29.936	262.216	43.0816	297.953	39.436	87.4345	13.2074	86.0373	85.0212	322.948	49.3685	66.5621	58.0579	71.6592	65.0736	37.6477	47.3555
c10	1	0	0	0	0	0	2.00277	0	1495.69	30.2728	92.5827	10.0058	40.4489	20.1336	25.4228	13.087	59.1998	26.9296	154.162	28.8826	675.448	43.569	737.874	36.0261	117.629	10.5098	416.964	139.549	278.451	81.4865	112.238	97.8826	58.0917	83.0046	43.0571	54.0521
C106	1	1	1.90987	0.844444	0.902124	2.03292	1.80998	1.08527	12.0768	39.9438	84.2585	10.4726	49.4662	21.8533	26.8643	19.0252	67.8163	29.5944	246.015	486.754	199.761	47.0356	234.922	51.8949	27.7699	7.93472	44.6176	22.1507	29.2019	18.0568	129.274	96.5417	84.038	79.2616	38.9972	32.2434
c10a	1	0	0	0	0	0	2.00277	0	3229.51	45.0458	85.9693	8.92344	41.9934	23.116	23.2323	10.6716	51.8963	18.2295	116.722	64.4282	463.167	43.3665	501.905	35.5831	79.5638	16.6708	188.542	60.0865	162.222	33.4467	82.4616	89.7992	82.6842	68.2426	30.1062	46.892
c10s	1	0	0	0	0	0	2.00277	0	1372.41	29.1101	69.9635	9.48475	32.9245	18.1234	18.8997	13.1173	77.9993	28.2168	119.995	35.5301	178.422	46.0791	205.047	18.2973	75.7256	11.7733	87.2123	28.4751	68.8946	24.3841	78.7889	88.9104	70.9814	82.6275	38.6697	47.1835
C125PM	1	0	1.90987	0.844444	0.902124	2.92855	1.80998	1.08527	24.4766	33.4606	79.458	21.7599	40.2682	20.585	22.5926	12.1232	70.2794	31.9003	310.797	131.868	260.675	42.971	297.753	32.0442	29.2446	15.8116	91.3657	59.1272	125.053	27.9009	89.442	86.9455	75.2625	81.0095	29.4515	37.2449
c2bbe1	0	0	0	0	0	0	0	0	571.057	48.6207	84.8928	9.43289	41.6323	18.7257	36.6218	57.0514	67.9438	28.0238	272.664	105.438	63.132	48.4257	71.1016	28.4816	19.3492	15.0933	334.803	124.998	250.245	78.5168	94.4167	100.063	82.927	93.2667	35.1585	38.5658
C32	1	1	2.94213	1.14444	1.16046	1.03853	2.00277	1.09228	29.5773	23.8997	82.869	22.9974	56.5408	24.1642	24.809	37.6981	74.4123	20.4356	173.084	378.865	548.706	34.1757	648.036	35.7361	28.8015	15.497	77.0114	43.2354	264.802	37.7742	99.1183	72.5624	66.9949	80.3023	31.9947	44.2704
C70	1	0	1.94213	1.14444	1.16046	1.03853	2.00277	1.09228	20.0831	29.0499	77.4922	37.7719	41.5769	20.1904	23.018	11.8862	80.8525	24.5883	167.261	616.963	303.855	43.3089	366.246	29.6893	17.6145	13.5158	29.0295	24.484	15.7643	20.4612	84.7429	85.964	57.7112	94.0724	32.0486	31.5264
C75	1	2	1.94213	1.14444	1.16046	1.03853	2.00277	1.09228	19.6341	33.0384	77.4257	16.7243	38.6383	20.4624	20.9097	12.4064	66.3825	23.6581	234.519	94.3729	369.83	33.3827	475.417	45.9279	20.7589	9.56384	51.9553	20.4802	28.5873	24.2075	93.7405	82.3696	61.5791	80.8687	35.2566	42.5244
C80	1	1	3.14801	1.01111	0.937418	2.92855	2.18726	0.822457	30.9372	38.1338	102.326	13.6599	45.3355	26.2501	26.8011	19.883	85.217	31.4766	607.041	263.579	123.808	52.4122	240.04	58.047	32.7581	8.15424	49.2557	26.4471	21.8804	32.0913	86.9106	77.9961	70.8109	92.3449	36.7454	45.0833
C84	1	1	2.14801	1.01111	0.937418	1.92855	2.18726	2.82246	29.4138	30.7612	97.619	15.8188	45.1946	20.9474	23.3941	25.3515	73.6968	26.3489	369.031	295.505	329.755	43.1653	345.746	39.6003	54.694	8.59787	36.2103	17.8767	21.6079	29.0771	95.0036	89.6847	68.5037	86.7595	29.7713	32.739
C99	1	2	1.14801	1.01111	0.937418	0.928554	1.18726	0.822457	27.6301	24.0659	100.11	10.027	41.3607	20.8838	22.597	21.0096	86.4288	26.9591	705.548	191.982	299.934	41.4267	338.216	43.1596	24.1481	8.90034	45.9248	21.6015	18.4122	25.1666	88.9875	93.2518	87.7204	107.889	39.6679	38.2339
C99_4	1	0	0	0	0	0	0	0	13.5789	43.9689	107.747	11.8681	54.5717	20.7386	24.6385	14.921	88.7768	34.802	672.56	1463.19	65.751	39.1082	129.176	39.3805	23.9863	13.0595	13.1929	12.2671	14.3892	16.7856	92.6918	109.355	89.3292	87.7252	25.5411	48.2514
C99_6	1	0	0	0	0	0	0	0	13.8298	37.264	103.489	12.544	44.4441	23.5236	23.7608	16.5978	60.2809	24.0865	477.494	1528.92	61.7835	36.5617	71.0316	26.2434	17.3868	10.1414	15.7939	13.0281	12.3157	12.363	62.9254	98.8583	64.3412	97.5791	46.3588	30.5847
CACO2	1	1	1.90987	2.84444	0.902124	1.03292	1.80998	1.08527	1662.34	29.6219	110.504	15.4659	44.2158	21.4351	90.9827	215.311	71.3905	23.7292	88.0652	89.0837	76.8839	35.1197	83.8913	30.7685	37.3633	12.1932	253.175	189.707	788.994	115.767	111.907	96.9024	86.1889	84.7787	36.3474	36.6718
CaR1	1	2	0.909867	0	0.902124	1.03292	1.80998	1.08527	14.6649	29.2161	92.9099	33.3897	46.6657	19.0712	66.3792	87.2474	62.5501	23.9921	77.5342	613.156	1417.57	39.7813	1525.11	37.9643	497.692	56.1257	360.219	171.518	733.229	112.276	84.6061	96.9655	58.6826	83.7949	47.9444	32.9994
CC20	1	4	1.14801	1.01111	0.937418	0.928554	2.18726	0.822457	1279.62	36.0151	108.897	33.4172	42.8668	20.0596	22.7431	14.3677	56.086	21.8704	97.9498	273.368	105.592	38.0652	96.9279	29.3161	32.2094	10.734	327.189	208.284	2245.31	80.4271	85.8324	105.945	82.9304	84.0957	33.4135	42.9862
CCK81	2	1	3.14801	2.01111	0.937418	0.928554	2.18726	2.82246	33.7543	35.4047	95.6266	15.7711	51.3172	23.2144	27.4081	14.3534	88.4776	31.2226	382.149	612.625	236.704	38.4254	287.331	39.3104	49.1054	9.52745	51.8158	21.3579	56.695	17.3803	96.6374	124.73	78.1872	87.1839	49.1551	47.6581
CCO7	1	1	1.90987	0.844444	0.902124	2.03292	1.80998	1.08527	1197.74	42.2773	97.1317	26.6156	35.7611	19.7541	17.6629	13.8986	73.6779	18.5201	69.236	206.372	88.6335	41.3929	107.519	27.882	28.2616	9.81168	637.526	473.569	1412.66	175.866	94.3957	82.6911	79.9042	88.7171	29.5478	25.9897
CL11	0	0	0	0	0	0	0	0	12.4609	38.348	111.904	18.8416	44.2471	20.4601	27.119	13.2721	56.4433	29.5552	134.564	1666.61	892.959	37.2694	1041.32	31.2954	33.2129	11.7741	79.6134	24.1337	43.8918	20.8261	100.947	100.027	74.9367	73.1593	39.1139	42.2881
CL14	0	2	0	0	0	0	0	0	13.5594	36.8653	60.0199	11.9199	39.7364	20.0315	23.7256	12.9165	62.8055	20.6285	97.4898	52.731	407.193	45.7954	517.717	44.591	42.51	9.2348	40.4492	23.4753	51.9402	18.0823	109.556	109.32	82.4444	87.9987	42.0511	35.5493
CL40	0	1	0	0	0	0	0	0	16.2923	43.3605	82.7134	21.0551	45.3893	18.9516	19.0985	15.4856	69.6523	27.2346	204.683	1702.81	472.759	42.2664	436.056	34.4609	59.2741	39.5131	25.4868	13.2601	13.0263	34.4383	122.912	77.5605	67.5255	107.547	44.2449	47.8279
Colo201	1	3	1.90987	2.84444	1.90212	1.03292	1.80998	1.08527	17.5303	25.1279	86.8979	11.4901	48.5234	22.3368	24.7621	12.7182	70.4125	27.534	702.259	3200.1	956.705	41.3986	1114.36	41.4397	55.5171	9.09296	22.4403	11.5995	9.35216	19.2842	97.1701	112.419	59.4428	83.6214	27.9415	40.3132
COLO205	1	0	0	0	0	0	0	0	12.7653	32.2498	98.5128	13.2175	38.3565	19.8146	24.0045	22.2304	61.2862	32.467	380.18	3910.13	422.653	49.0285	427.212	54.7224	44.3253	14.061	15.4465	14.9147	15.539	16.187	98.6563	98.2095	108.854	96.3291	35.9151	54.4221
Colo206	1	3	2.90987	0	0.902124	1.03292	0	1.08527	14.8462	35.7681	76.6679	17.257	39.6256	19.7722	20.8444	12.532	91.5159	25.2426	402.884	2556.4	676.131	42.5067	905.399	38.6555	94.6624	11.0771	30.6848	12.8216	7.82478	14.9176	88.9788	96.0877	52.9746	74.9554	27.6158	42.8859
Colo320DM	1	0	2.90987	0.844444	0.902124	1.03292	1.80998	1.08527	2570.26	26.1076	99.6868	17.2376	38.6453	22.74	21.9161	11.0844	65.6485	29.9649	58.5172	25.7134	48.751	39.9787	72.3108	39.1318	31.8336	15.5669	386.218	246.894	858.378	107.671	89.3255	93.7567	76.6636	83.7856	41.1406	42.6593
Colo320HSR	1	0	2.90987	0.844444	0.902124	1.03292	1.80998	1.08527	1834.92	42.4408	111.609	12.7095	53.5658	25.6853	20.887	12.236	80.9809	32.4229	88.1672	29.813	88.5684	52.704	111.464	49.1177	30.5777	10.1092	199.425	123.914	679.707	98.8096	91.9712	114.401	80.3369	125.216	44.7545	47.0193
COLO678	1	2	1.94213	1.14444	1.16046	2.03853	1.00277	1.09228	1063.13	37.1389	80.1111	16.3817	51.8852	18.8632	110.145	136.371	70.0639	27.9972	90.0466	117.549	407.784	36.6149	397.58	32.217	135.311	8.38354	188.501	90.805	357.146	75.4051	119.271	112.662	73.8814	109.867	42.6375	30.8389
CW2	0	2	2.90987	2.84444	0.902124	3.03292	0.809976	3.08527	15.3232	34.0058	88.2271	13.6995	43.8538	21.3812	20.1393	18.1853	72.7906	27.508	110.795	409.972	183.338	35.0555	191.151	24.2056	54.939	10.2556	24.7499	18.2158	9.07275	14.1564	88.9844	87.7459	72.8103	82.8805	27.8271	39.1036
CX1	1	2	1.90987	0.844444	1.90212	1.03292	1.80998	3.08527	22.8487	33.5404	89.0485	13.8296	43.1246	20.6077	22.8901	15.6313	66.6351	19.4165	390.59	459.567	447.282	46.0019	544.527	30.3592	38.4007	12.3248	24.7043	16.0016	10.375	14.0912	123.908	122.563	100.563	76.8504	23.6705	36.1053
DLD1	2	2	2.14801	1.01111	0.937418	1.92855	2.18726	1.82246	32.2172	40.0253	95.922	49.4819	40.2674	20.3292	24.862	14.509	62.3994	27.1274	88.9924	1323.92	667.623	48.4408	594.709	34.2718	39.6418	46.3433	49.3425	27.7493	17.8848	23.5656	91.4201	98.8309	81.1579	86.5463	38.5546	34.6098
Gp2D	2	3	2.14801	3.01111	2.93742	1.92855	1.18726	1.82246	30.586	36.4817	90.5373	12.7068	41.6822	23.3929	21.792	15.1575	83.5611	21.8011	90.4238	218.508	471.567	43.6582	371.163	36.4718	133.498	7.40444	42.0831	21.4996	18.7081	17.8362	103.639	107.138	68.342	86.3043	39.3699	43.3422
GP2D	2	0	0	0	0	0	0	0	16.2092	25.5213	106.14	11.1747	36.253	20.8806	21.8282	14.2217	72.6318	29.0785	122.437	322.812	230.166	25.8822	234.738	34.1057	97.7856	12.422	34.2697	16.1336	25.2195	17.0591	93.0975	91.167	73.8707	90.9921	36.1379	28.1675
GP5D	2	0	0	0	0	0	0	0	12.0242	35.1331	103.499	11.1956	37.2162	28.1166	22.8918	11.5335	51.9197	27.7678	144.709	693.364	141.806	35.2048	165.971	31.9435	95.9666	13.613	31.5277	25.8702	22.4566	17.8834	106.471	100.867	68.834	92.2566	35.6811	38.6865
HCA46	1	1	2.90987	2.84444	0.902124	1.03292	1.80998	2.08527	18.1143	38.745	96.5303	15.0803	31.5186	22.2771	26.3619	19.0372	77.847	22.5648	422.366	534.79	141.846	39.8691	126.409	40.07	59.6177	12.7168	39.8142	14.8734	13.1437	14.1131	94.7399	91.7019	65.1462	85.0135	36.0621	42.4799
HCA7	2	2	2.14801	1.01111	0.937418	0.928554	2.18726	0.822457	31.0543	45.5248	97.728	17.9806	42.2023	18.4841	25.7948	14.2309	66.5732	25.2734	118.658	83.1682	653.426	37.0058	579.217	30.1865	73.1548	8.23718	65.2334	32.7361	139.525	19.4157	114.608	100.888	73.557	107.447	36.7347	32.4508
HCC2998	0	1	1.94213	0	1.16046	2.03853	2.00277	1.09228	18.9403	39.131	90.0553	17.6497	50.6205	20.7017	27.3008	12.5367	75.6291	29.9615	118.873	966.597	106.415	49.7636	86.5763	35.2358	30.6984	26.3772	45.5646	20.0332	16.1792	16.4488	137.181	105.51	99.9656	72.1496	52.5817	49.5935
HCC56	0	2	0	0	0	0	0	0	15.8637	36.531	87.0631	17.0396	41.7467	23.466	22.6238	10.5017	71.7208	23.8995	461.987	833.94	228.907	37.8334	260.925	35.8669	37.8033	13.8421	28.9899	9.95002	9.02783	14.2701	85.5236	100.828	73.3299	81.8148	36.3771	34.1289
HCT116	2	2	1.14801	2.01111	0.937418	1.92855	1.18726	1.82246	35.8102	33.4311	76.6636	61.4913	44.1702	24.1525	26.7265	15.4019	59.717	26.2121	87.7471	673.853	285.149	52.7581	343.57	34.4789	45.906	13.1008	178.834	103.807	996.924	51.1531	82.3234	88.9813	80.9119	78.114	27.8729	30.6641
HCT116_bulk	2	0	0	0	0	0	0	0	33.7941	24.9049	96.9857	57.8783	41.6282	17.7235	26.8999	15.681	67.9471	25.4133	138.435	469.311	340.037	40.9397	372.584	25.5705	57.9614	8.71016	774.408	271.958	511.631	81.749	94.0789	91.4151	117.172	91.6352	51.8661	42.1669
HCT116_CDX1	2	0	1.14801	2.01111	0.937418	1.92855	1.18726	1.82246	106.922	33.4497	73.8814	89.8745	51.3037	23.1243	21.4043	14.0554	59.2778	24.3642	75.5364	447.44	395.71	37.1253	565.969	33.4522	42.1874	12.0165	81.6556	68.6791	496.868	43.4387	79.3501	90.7628	62.8382	66.7849	32.8557	26.3365
HCT116_HIGH	2	0	0	0	0	0	0	0	47.3693	44.5613	95.9007	38.292	55.5502	28.4244	33.4708	21.4459	90.817	21.4012	141.635	272.275	341.672	41.4951	396.988	46.6253	60.2125	13.9458	772.007	200.547	376.966	61.6582	109.697	123.217	96.1443	118.823	41.3599	41.3367
HCT116_LOW	2	0	0	0	0	0	0	0	39.8299	39.1771	88.1476	49.4028	36.2189	26.3778	27.3046	16.8373	72.3695	36.6779	159.394	481.022	410.136	40.0933	454.41	37.1191	84.013	10.773	748.485	272.999	551.364	113.58	75.0802	97.2536	78.3369	113.55	37.6939	47.7203
HCT116_vec	2	0	1.14801	2.01111	0.937418	1.92855	1.18726	1.82246	29.9045	33.7581	81.5464	99.4266	47.6931	23.2186	29.0046	14.3394	56.3885	24.8403	90.9518	546.705	374.603	33.2092	466.874	26.2237	72.2718	9.66728	181.004	144.404	1523.42	74.7416	83.339	110.409	65.9408	83.7264	34.9505	34.14
HCT15	2	2	2.14801	1.01111	0.937418	1.92855	2.18726	1.82246	32.2666	35.4447	96.4046	81.5702	46.0274	21.1484	26.0258	17.9781	64.1586	28.5861	84.6032	1156.62	580.141	46.6789	620.097	31.965	37.5411	92.9286	40.7317	18.862	19.1344	21.3285	94.1742	99.9919	78.8184	98.4153	40.7794	31.9969
HCT8	2	0	0	0	0	0	0	0	13.442	41.4497	84.2299	81.4476	39.1343	22.5357	23.4127	14.2514	56.9155	18.9537	116.836	318.215	367.773	51.7411	439.129	36.2716	25.8851	11.2973	20.8287	14.1719	12.4828	17.1566	111.92	85.3583	72.1386	89.8085	41.5974	44.2839
HDC111	1	4	0.942125	0	1.16046	2.03853	1.00277	2.09228	22.3929	38.1069	91.7604	13.9396	37.8316	23.6648	15.5486	13.1142	68.3552	22.5387	442.938	997.235	367.426	39.4343	416.719	26.0364	64.5104	8.98376	47.2774	19.1367	16.6797	21.4624	99.6847	64.7115	76.7593	100.883	30.2055	31.3467
HDC114	1	3	1.94213	1.14444	1.16046	1.03853	2.00277	3.09228	19.1279	34.2979	95.5484	15.4993	44.8473	20.6865	21.3409	13.8933	53.0415	24.4281	175.615	361.126	74.6484	45.3777	67.5882	40.1345	31.7288	9.72521	41.9701	18.61	15.1887	21.8736	74.81	107.152	64.5936	89.7761	35.33	33.8527
HDC135	0	0	0.909867	2.84444	1.90212	1.03292	1.80998	2.08527	2952.46	34.7117	84.2199	15.1631	37.0435	19.3952	18.9123	17.4153	63.5112	23.0659	83.3165	583.699	234.124	38.2477	249.432	25.7175	21.335	11.5839	31.7391	11.2883	11.5179	11.744	86.9763	89.1066	62.1167	91.7242	39.661	38.2875
HDC142	2	3	1.94213	3.14444	3.16046	1.03853	2.00277	1.09228	18.3457	44.0274	81.9766	38.5086	49.484	18.3681	20.1482	9.78851	76.729	23.5881	213.676	356.676	387.507	39.4092	417.945	53.4227	38.4838	9.22482	44.1209	19.8934	18.1449	18.0061	108.561	109.871	73.7336	79.2555	35.0813	35.0417
HDC143	2	2	1.94213	1.14444	1.16046	1.03853	1.00277	1.09228	13.5631	28.8404	85.3146	21.2136	42.9019	18.8785	24.0671	11.858	64.3198	25.8485	315.16	1191.86	265.241	50.5346	285.356	30.124	35.649	14.8826	47.871	14.4538	10.497	21.4255	109.352	160.108	69.0027	124.108	37.8012	36.0686
HDC54	1	3	1.94213	0	1.16046	1.03853	0	1.09228	14.5165	37.3597	102.511	15.3678	57.3738	22.1883	19.8404	15.5688	79.5925	26.1386	243.303	811.063	226.508	48.8664	248.879	40.2275	46.3234	9.69842	37.5627	17.3466	15.8883	19.8699	93.3644	102.482	80.3892	101.155	55.0423	40.0658
HDC57	1	2	1.94213	3.14444	1.16046	1.03853	2.00277	1.09228	14.8279	30.5434	114.294	12.3311	49.496	20.4782	25.6545	11.6404	82.0852	38.0884	217.863	610.264	404.975	51.1825	494.313	50.1282	36.191	14.5566	30.4211	20.7145	21.3295	18.9974	87.645	104.109	76.104	80.67	46.0851	44.7777
HDC73	1	2	0.942125	1.14444	1.16046	1.03853	1.00277	2.09228	33.1459	29.5515	115.095	14.1736	38.1019	18.6249	21.9835	15.065	77.8999	25.8535	190.66	1675.18	230.346	49.8627	253.735	35.4789	26.0538	12.2048	42.6925	21.5184	13.6005	21.3913	94.2839	104.694	65.5344	87.3854	38.7561	40.743
HDC8	1	3	1.94213	1.14444	1.16046	2.03853	2.00277	1.09228	766.079	27.1129	82.3713	336.357	36.9289	27.5147	17.3995	11.8478	56.209	23.7918	68.1726	1250.94	569.535	33.6529	707.973	16.5521	187.393	19.235	62.1103	13.9728	48.7726	17.2327	76.6094	102.509	93.2492	93.5393	26.3166	44.4188
HDC82	1	3	1.90987	0	0.902124	1.03292	0	1.08527	18.9669	45.1095	95.5941	41.9579	49.2885	19.7243	21.321	11.9081	85.337	27.575	167.741	435.657	565.056	51.5271	666.107	48.7622	35.0682	18.2517	52.7976	41.1078	170.686	31.6769	81.2407	91.4607	76.0702	91.3695	44.5925	48.1642
HDC9	0	3	2.94213	1.14444	1.16046	1.03853	2.00277	3.09228	81.5425	54.481	94.3696	25.6639	44.6299	29.2929	19.654	17.0428	58.2845	27.9822	81.9266	96.6006	119.938	55.5879	150.216	30.8718	16.7888	27.5561	76.803	70.0343	286.47	24.0814	81.3754	107.89	70.9377	71.3381	39.9532	53.1523
HRA19	1	1	2.14801	1.01111	0.937418	0.928554	2.18726	1.82246	28.8312	32.7418	87.4587	11.3088	46.6224	25.7609	32.1741	16.0711	74.2434	28.3483	124.104	1159.51	189.577	42.449	209.07	28.1683	42.3553	14.6542	40.5711	17.5674	17.2958	18.613	92.7664	124.851	73.171	95.424	37.8528	38.1672
HT29	1	1	2.14801	1.01111	1.93742	0.928554	2.18726	2.82246	27.6896	41.907	100.153	15.962	41.3653	22.711	24.9319	15.2686	66.57	30.1637	436.307	663.853	441.675	42.1468	418.865	38.3565	38.5206	13.3733	45.7944	26.3635	15.7465	21.2063	151.278	113.265	77.2857	85.1881	37.8366	36.3993
HT29	1	0	0	0	0	0	0	0	24.0183	36.7583	99.0517	17.6218	50.2925	22.8977	26.5778	16.7292	61.9387	22.8782	173.738	648.036	689.831	49.6661	695.521	29.2341	25.3992	21.985	19.9012	14.9334	9.93989	18.9503	125.179	112.724	64.8269	64.3429	43.8374	24.9943
HT55	1	1	1.90987	0.844444	0.902124	1.03292	1.80998	1.08527	26.777	35.6802	99.4762	15.1548	43.6403	23.1582	20.5304	15.4413	53.626	23.209	330.134	666.809	490.157	36.9717	517.068	38.2981	27.429	20.3947	34.0056	20.4544	15.5693	13.8767	89.1603	112.411	87.6493	92.697	35.0628	33.3547
ISCEROL	0	0	0	0	0	0	0	0	18.9971	48.5053	115.284	71.5396	44.094	30.391	25.3684	16.7533	54.9931	28.2025	89.9817	984.393	703.633	29.7261	902.135	45.8443	156.638	9.49699	39.828	23.0229	13.4975	16.5066	88.45	102.058	75.6816	92.5038	40.509	25.4466
JHCOLOY1	0	1	0	0	0	0	0	0	21.518	38.4084	100.604	13.4146	51.0621	27.7724	16.4853	13.4266	75.0333	26.0836	580.994	395.499	620.445	52.9431	680.49	27.3673	90.5555	10.8769	38.3361	26.0684	16.1796	17.7888	104.066	102.708	89.6269	105.372	28.4978	42.6827
JHSKREC	0	0	0	0	0	0	0	0	2162.97	41.6444	70.8689	198.271	37.6253	21.2036	26.04	13.3157	55.1565	24.5321	116.065	77.5385	392.37	39.4537	375.755	30.4196	20.3014	15.0397	645.159	285.166	604.429	143.026	97.4662	92.2758	72.0746	84.6401	44.2158	38.5239
KM20L2	0	2	1.90987	0.844444	1.90212	1.03292	1.80998	3.08527	16.7285	36.5586	77.9901	19.2475	47.4593	20.521	22.3318	12.4351	64.4018	24.4773	169.12	527.311	518.202	42.2887	583.877	29.4007	26.0926	37.1168	21.9884	15.2577	12.0783	13.2855	122.301	84.3198	89.8801	73.8006	34.5121	38.2949
LIM1215	2	0	0	0	0	0	0	0	14.5174	35.1107	95.7048	11.3976	54.0428	21.872	26.6889	22.7241	91.2176	27.3512	171.817	529.795	437.443	45.9741	442.959	47.4488	36.4604	18.9686	15.2134	14.8442	15.3946	16.0219	135.256	113.48	88.3293	80.2851	41.0039	44.2928
LIM1863	1	1	2.14801	1.01111	0.937418	0.928554	2.18726	0.822457	31.0892	34.2265	94.8851	14.0214	40.6026	22.2916	20.0504	18.6593	90.2584	22.0604	423.553	1428.12	528.258	48.5487	553.915	42.1538	34.4082	9.80243	44.4253	30.0108	16.8103	18.8505	94.1318	116.792	72.5207	74.121	32.6513	45.6765
LIM1863	1	0	0	0	0	0	0	0	24.0251	39.0018	91.365	12.1599	46.2714	25.1178	21.4206	21.2655	87.1742	26.7952	375.461	2734	438.323	51.2919	422.82	34.7685	44.2042	10.3369	39.9557	20.3924	16.6473	16.4235	91.2663	127.801	75.9506	126.24	33.8741	19.3635
LIM2405	2	0	0	0	0	0	0	0	12.0865	31.3478	83.9117	9.35126	34.8571	23.8119	19.2318	16.6243	64.9011	28.2168	103.703	421.684	1037.5	34.783	1002.96	17.4469	82.1575	15.9017	52.0393	11.4594	21.9636	14.4987	77.0643	92.019	74.6148	80.6314	40.9281	22.1771
Lovo	2	3	2.14801	1.01111	0.937418	1.92855	1.18726	0.822457	1652.8	39.8993	120.564	70.9062	50.7406	23.1458	30.923	14.8505	72.8406	23.6915	82.7806	1016.67	1056.88	38.1645	1015.86	35.2546	53.9144	171.988	98.8802	39.7059	224.551	22.7774	88.2601	117.068	75.8433	102.135	44.9357	42.0788
LS1034	1	1	1.90987	0.844444	0.902124	1.03292	1.80998	1.08527	18.4974	30.0345	74.8132	16.4931	37.089	22.0096	22.4156	16.7588	67.9702	24.7703	265.58	473.835	371.269	46.8365	407.253	31.5262	20.2531	10.8219	26.9626	11.0832	13.0939	11.1231	80.95	106.373	99.9746	79.3457	33.6047	35.8656
LS123	0	2	1.90987	0.844444	0.902124	2.03292	1.80998	1.08527	325.578	38.6788	82.0641	28.9385	43.1767	22.7255	117.317	160.782	64.8102	20.333	85.1857	159.532	1092.41	40.3068	937.562	31.4732	217.717	13.7977	282.538	122.776	513.443	69.096	107.29	84.8928	57.6369	94.3859	36.6467	49.6138
LS174T	2	3	1.14801	2.01111	0.937418	1.92855	1.18726	1.82246	357.277	35.6549	80.3218	12.1448	44.1983	23.3348	23.2308	12.4499	57.694	24.6684	129.315	694.658	174.031	43.848	232.92	35.9313	44.9139	11.1496	46.2625	30.8487	17.4478	26.7514	86.0206	93.6625	74.2871	77.5325	35.1931	43.0915
LS174T_bulk	2	0	0	0	0	0	0	0	60.2296	31.1885	81.4792	24.6615	47.9883	21.2453	20.9752	14.3175	85.6755	26.6403	198.193	342.797	347.291	45.7985	290.942	40.2088	37.0086	14.0273	44.5585	29.3836	31.9309	30.5737	122.13	90.4382	65.0343	79.8029	27.4749	38.1976
LS174T_clone 1	2	0	0	0	0	0	0	0	32.3905	43.719	90.6107	20.7058	45.3418	23.3336	24.4574	17.5512	59.9476	24.1244	167.848	473.1	606.789	46.3167	651.332	34.0669	79.8356	13.7047	65.3602	34.2832	42.2477	26.8701	92.086	105.242	81.9016	95.4313	41.5187	37.1165
LS174T_clone 2	2	0	0	0	0	0	0	0	53.8454	32.3966	102.149	23.9614	36.7044	21.8591	29.288	19.427	61.4704	27.293	169.57	432.567	161.875	37.0877	242.559	34.8651	32.4541	13.6738	60.0229	30.4635	51.7541	22.0377	75.4605	102.434	76.6939	88.4782	42.3295	35.4315
LS174T_siCDX1	2	0	1.14801	2.01111	0.937418	1.92855	1.18726	1.82246	30.1457	35.4037	79.4073	11.418	47.7994	21.7946	23.5792	14.2349	68.1717	28.6567	92.1569	680.773	85.0707	33.7389	113.163	41.2459	40.24	9.10412	38.1169	32.2398	16.1889	22.094	88.3226	96.2177	68.5464	90.6421	35.9226	28.9917
LS174T_siVec	2	0	1.14801	2.01111	0.937418	1.92855	1.18726	1.82246	28.9127	34.9669	79.4381	13.3036	51.9575	21.8873	25.4443	14.1225	63.371	26.5894	113.017	626.869	170.604	40.1114	181.046	36.8257	59.1202	9.16757	45.0651	24.5759	14.7801	21.0461	92.9363	112.108	67.2643	99.3398	42.8808	24.8591
LS180	2	1	3.14801	2.01111	0.937418	1.92855	1.18726	1.82246	30.4633	41.1637	101.662	10.8905	41.274	23.9925	25.6677	14.6619	85.6802	27.1726	199.951	523.15	318.319	36.0768	369.469	33.8023	65.0564	8.60199	35.9508	21.2823	17.7166	20.3351	124.821	101.977	68.4335	102.347	41.4009	37.1096
LS180_bulk	2	0	0	0	0	0	0	0	46.868	34.2568	108.337	5.27898	44.3472	24.5206	20.7831	13.2775	81.4284	22.1301	195.866	229.548	243.651	48.1736	269.014	47.54	96.1583	8.91219	6.71352	13.9093	10.87	12.0325	118.9	124.116	82.6281	94.4252	22.3928	32.7763
LS180_HIGH	2	0	0	0	0	0	0	0	47.4195	28.7281	91.6682	4.30938	42.3885	21.8926	27.7184	15.8893	52.1155	22.8652	247.549	235.718	247.191	39.3055	275.174	30.976	115.313	7.64258	10.2624	11.581	13.025	17.6645	117.74	98.019	64.5234	78.2522	45.1064	33.8875
LS180_LOW	2	0	0	0	0	0	0	0	33.3499	41.5248	85.0453	5.28612	38.6557	21.0338	25.0433	21.4377	72.9512	30.0183	188.803	232.328	237.231	51.2472	229.791	46.6243	46.3411	9.67412	14.7831	12.53	11.9064	14.4484	98.053	117.463	69.9475	67.908	31.3569	41.0588
LS411	2	2	2.14801	1.01111	1.93742	0.928554	2.18726	0.822457	33.9237	28.864	87.3727	12.6463	41.079	21.4	24.1697	17.4992	66.388	27.5647	187.121	911.059	295.915	41.2102	359.488	27.2754	70.6202	9.30277	45.1959	18.5338	16.5799	15.4349	86.6285	100.678	69.333	112.059	31.5522	42.1795
LS513	1	1	1.14801	1.01111	0.937418	1.92855	1.18726	0.822457	28.6343	40.8111	94.8562	20.4282	41.2977	22.3003	25.8537	21.6301	72.3294	24.6152	181.96	592.442	354.276	47.0577	401.24	60.0407	48.305	8.70202	58.7163	32.2467	19.0682	42.6268	105.805	69.1851	78.1579	82.4873	36.8068	48.5891
NCIH498	0	0	0	0	0	0	0	0	12.4996	32.2554	82.1945	170.156	32.2726	23.4888	21.6133	11.482	70.3476	23.3379	188.884	1560.4	472.975	36.5128	514.447	45.8675	52.993	14.5293	9.86603	17.1773	12.7776	16.254	108.456	92.7915	63.111	85.9258	44.503	21.4809
NCIH508	0	3	0.909867	0.844444	2.90212	1.03292	1.80998	2.08527	12.837	38.2548	119.03	18.9525	46.988	19.2575	22.6566	11.3478	63.8542	25.8758	144.456	122.322	288.931	52.8514	264.727	57.8386	89.8272	9.31561	44.7055	16.5089	13.3001	15.4383	105.035	99.4914	96.9077	96.525	41.5452	43.3374
NCIH548	1	3	1.90987	2.84444	1.90212	1.03292	1.80998	1.08527	16.9182	41.7441	87.8335	15.2513	46.3459	22.7756	20.2574	15.9431	57.8558	31.0183	408.655	2433.98	442.352	47.4587	538.749	46.2137	38.8717	10.2278	28.0623	17.4906	9.12187	15.9609	102.892	120.331	74.6521	98.0836	33.6417	45.6066
NCIH716	1	3	1.14801	1.01111	0.937418	0.928554	2.18726	0.822457	35.1577	35.6589	134.534	281.285	36.7039	22.0259	21.0525	20.6161	84.5018	21.1539	103.999	181.178	77.6584	50.0671	118.589	37.3372	34.2148	9.63403	43.6016	24.2782	24.0268	13.7451	110.319	87.0119	71.6662	107.133	36.6594	48.6808
NCIH747	1	2	1.94213	1.14444	1.16046	2.03853	2.00277	1.09228	13.9835	27.5603	79.188	13.8032	41.6141	18.5764	19.8461	15.1225	59.6885	21.1247	91.2935	44.0958	508.227	45.3874	589.121	37.309	30.6248	8.93396	279.184	180.906	849.7	131.349	98.8076	102.562	99.8417	86.3952	27.0053	28.6426
OUMS23	0	3	0	0	0.160458	0	0	0	40.1314	31.7728	69.5399	20.3251	40.13	22.1722	129.84	301.566	62.9646	35.3427	107.243	26.703	179.531	51.1496	186.834	36.0916	47.0949	9.71423	181.919	162.181	526.705	63.5808	99.1699	69.2509	57.5044	72.4513	42.7212	39.9848
OXCO1	0	1	1.90987	0.844444	1.90212	1.03292	1.80998	1.08527	1111.27	31.3814	140.117	291.005	52.4747	26.1279	25.9735	16.7802	64.2271	25.7461	80.3953	1172.52	632.157	50.3552	711.12	39.1242	42.5294	19.3234	255.09	123.861	447.62	99.1149	86.6075	110.276	65.8431	89.5145	47.2119	39.0586
OXCO2	0	1	2.94213	1.14444	1.16046	1.03853	1.00277	1.09228	16.2858	54.9033	135.457	18.7595	64.484	28.6666	35.3817	16.7307	86.3671	30.2814	360.474	338.713	629.778	69.6504	774.591	54.3961	92.7194	10.8962	57.0368	25.77	15.8625	24.9942	108.292	118.972	69.164	121.258	64.1924	31.598
OXCO3	0	1	2.94213	1.14444	1.16046	3.03853	2.00277	1.09228	822.385	46.2294	120.023	191.683	43.7615	21.5985	24.9639	11.1625	40.5897	26.566	99.3061	1629.37	1012.49	37.0428	1142.83	42.6706	37.2828	18.2144	255.174	202.127	723.44	103.139	94.0874	101.293	78.8708	90.1434	27.7412	48.5238
OXCO4	1	0	0	0	0	0	0	0	11.6397	40.1609	97.3062	11.8911	41.6372	21.5695	23.6792	12.6373	72.2642	25.8846	308.3	603.818	141.791	30.5939	132.174	20.3035	24.2718	13.3552	16.9246	12.408	12.4587	15.0175	105.647	122.484	103.172	109.661	37.7656	31.4862
PCJW	1	3	3.14801	1.01111	0.937418	0.928554	2.18726	0.822457	30.7877	33.3617	77.7359	13.4307	40.6158	23.6289	21.152	21.4932	66.251	25.414	389.824	150.707	1425.15	51.8898	1200.23	38.3376	36.0193	8.45603	41.9945	23.5582	17.3124	20.1221	90.2015	84.7217	61.7287	81.5583	32.424	39.4753
PMFKo14	0	2	0.909867	2.84444	0	1.03292	1.80998	1.08527	14.6877	39.77	102.172	143.127	43.9862	24.7914	18.0626	8.77002	61.3852	29.7154	75.4856	1306.24	650.804	46.3074	686.902	24.9623	91.4746	12.1953	30.6282	16.6238	8.00144	14.9539	87.144	86.0152	57.575	95.7161	41.0924	43.7018
RCM1	1	3	1.14801	0	0.937418	1.92855	2.18726	0.822457	45.7919	36.2676	82.3388	23.9144	40.0494	20.2553	18.3004	20.0289	76.2212	32.0962	307.384	299.524	602.393	47.1577	603.086	44.9092	50.3706	9.84922	58.1832	27.6729	32.8714	43.121	95.7135	68.9075	88.8851	83.7745	29.8496	39.4313
RKO	2	4	3.14801	1.01111	1.93742	0.928554	1.18726	1.82246	28.6941	28.0028	90.6868	12.8363	44.7818	22.4285	24.3507	14.957	65.7432	28.644	95.5703	19.8633	107.272	44.9422	146.966	27.4634	33.5393	9.33293	46.5616	21.9785	16.7985	25.054	93.8282	101.351	78.1471	78.761	37.8904	34.811
RW2982	0	3	0	0	0	0	0	0	12.2798	32.5334	74.768	15.5866	26.6669	22.1206	26.502	11.7814	71.3865	25.684	165.331	1111.27	95.1657	34.5691	95.2423	27.7022	26.961	14.5504	39.7687	37.265	66.0433	19.4458	54.664	134.129	79.3963	77.7467	16.6423	34.3615
RW7213	0	1	0	0	0	0	0	0	13.1227	30.4553	125.53	17.7048	37.5318	22.9031	19.9802	17.2423	75.0999	27.9144	488.045	1851.27	147.473	36.2633	163.457	41.4049	34.6872	20.9114	35.5604	43.9198	16.3652	14.8993	88.858	114.837	85.3151	86.8082	34.9703	27.8175
SKCO1	1	3	2.14801	1.01111	0.937418	1.92855	1.18726	0.822457	30.2198	38.1825	74.0999	10.588	37.426	22.1636	24.6949	18.8262	49.705	24.6956	318.359	407.123	883.178	45.2479	881.759	35.9211	72.6258	11.3699	41.3768	25.9151	18.706	25.6634	77.9556	104.512	70.4301	111.036	36.1171	32.4631
SNU1181	1	0	0	0	0	0	0	0	12.8664	37.1436	78.1574	11.3459	37.7091	21.1677	22.2074	17.235	66.7081	23.5238	327.863	1122.97	834.675	45.1202	875.122	62.5974	52.92	13.5818	13.3653	11.6963	12.0114	17.1276	96.113	88.4739	49.64	74.3093	44.7489	26.2748
SNU1235	1	0	0	0	0	0	0	0	14.4128	29.8186	75.7971	91.5171	54.9505	24.3392	22.0332	17.7192	59.4593	24.2227	94.1037	4164.71	174.144	39.9729	201.822	32.1536	22.8011	9.24485	22.6179	12.5103	12.2907	15.8046	64.7914	93.3443	63.2573	83.3789	32.9905	26.9214
SNU1406	1	0	0	0	0	0	0	0	13.643	59.3563	90.321	12.0748	37.0138	25.053	26.4684	14.5068	59.7327	26.8941	223.009	595.311	218.556	48.2093	254.034	38.4105	35.2551	14.1417	12.8404	11.5252	13.6182	15.1597	69.6239	101.148	84.2988	102.987	41.5682	43.7521
SNU1411	1	0	0	0	0	0	0	0	13.828	43.753	99.5245	18.5039	41.1845	23.8205	33.089	13.5014	111.557	23.8388	397.621	2089.73	833.339	41.9468	789.793	51.5239	58.2223	89.5735	20.3925	14.4638	13.3365	14.648	114.269	87.2425	78.3863	101.559	30.2663	53.9193
SNU1544	2	0	0	0	0	0	0	0	17.1288	32.1572	119.423	30.6697	64.3215	24.3623	25.9969	15.8605	86.2445	17.9227	187.055	342.975	1238	110.4	1292.19	74.2583	70.1908	16.3923	41.2242	17.6675	19.4496	14.6159	117.365	127.682	101.095	91.6142	29.8722	30.6954
SNU1684	2	0	0	0	0	0	0	0	20.1952	33.3536	80.8088	134.171	38.4814	19.2399	21.1781	12.8613	63.4985	31.895	85.4092	1269.37	208.619	36.393	259.53	21.9263	26.5848	18.6057	344.784	161.24	245.882	73.0398	99.0716	75.2787	62.603	84.8322	34.6165	39.3598
SNU1746_bis	2	0	0	0	0	0	0	0	15.8117	54.358	79.6079	10.7744	43.5117	18.6	19.9307	15.7889	99.6771	27.5294	171.671	267.167	224.343	43.6164	231.675	34.1407	53.0294	10.0143	13.0282	12.8255	10.8921	18.913	83.487	121.424	85.3826	71.9344	40.2275	38.6793
SNU254_bis	1	0	0	0	0	0	0	0	348.977	33.3501	87.3303	10.8484	39.3955	24.2311	67.3446	378.621	53.6241	25.4796	89.2339	138.86	528.203	42.736	526	29.1214	90.4645	10.2086	489.957	232.744	624.423	90.4896	114.295	104.805	82.0476	108.695	32.8122	31.2142
SNU479	1	0	0	0	0	0	0	0	12.2117	24.2538	103.811	15.2192	48.217	25.4036	20.0064	16.5423	73.0185	24.3897	370.531	515.418	173.953	52.0711	192.479	23.3748	37.2808	10.1518	18.6868	13.7834	12.9607	16.0027	89.6642	91.5908	39.225	78.0242	34.8564	33.5593
SNU70	1	0	0	0	0	0	0	0	1920.15	35.3133	92.7574	51.7082	59.1784	21.7631	26.1854	12.1002	79.0071	22.8466	116.712	43.3458	260.782	48.8169	290.479	35.4226	25.9158	12.1664	511.004	192.19	330.439	92.7085	94.0789	120.026	100.822	101.514	40.5567	50.6686
SNU977_bis	1	0	0	0	0	0	0	0	321.686	31.137	101.419	31.1818	57.5187	20.3176	23.6125	11.3672	81.829	30.4984	146.277	282.354	793.953	44.2523	844.077	61.8868	77.7769	11.7435	436.262	217.865	302.1	120.595	97.4662	88.5217	75.3116	76.1657	29.7257	27.559
SNUC1	0	1	0.909867	0.844444	0.902124	1.03292	1.80998	1.08527	14.6489	36.4695	80.4628	15.3579	55.0145	19.1658	21.5797	15.0417	66.0914	22.4181	77.1578	140.02	367.39	47.6357	427.402	44.8364	39.5926	13.0829	25.6399	16.2419	7.98942	18.1128	82.0141	104.745	77.1017	108.821	41.4379	45.7468
SNUC2B	2	3	1.14801	1.01111	0.937418	2.92855	2.18726	0.822457	112.677	33.321	102.469	13.3572	41.3607	22.3886	26.0718	16.6966	58.0603	22.8477	93.2926	413.803	171.104	46.4594	202.859	32.5668	84.9416	11.0578	108.011	59.4049	527.051	26.2184	94.154	119.274	69.164	89.1733	44.1053	33.0569
SW1116	1	2	1.94213	1.14444	1.16046	2.03853	2.00277	1.09228	19.7892	36.8441	90.788	40.6254	33.4126	26.3341	20.9768	12.8726	72.3755	19.2014	171.814	977.952	449.308	40.6815	467.004	31.0179	92.8024	74.8297	36.1409	35.7948	59.5376	30.0962	115.267	109.389	90.2172	67	32.7179	45.5661
SW1222	1	1	2.14801	1.01111	0.937418	0.928554	2.18726	0.822457	29.3826	36.7785	96.6066	11.5343	40.9576	18.2632	25.5923	19.1904	81.6737	27.2802	315.269	214.776	173.759	39.5627	211.997	35.8403	42.0461	19.1228	43.2051	26.2181	33.8457	25.6454	95.4663	124.936	72.2582	119.041	41.7609	33.5856
SW1222_bulk	1	0	0	0	0	0	0	0	53.7182	34.0407	70.2911	40.5222	52.2623	20.6227	17.7027	20.1945	67.0205	27.3659	213.677	597.105	376.668	39.994	500.515	35.552	20.2019	27.4549	26.9451	11.094	12.2165	12.9633	109.217	71.2437	80.0878	84.126	38.8645	31.4956
SW1222_HIGH	1	0	0	0	0	0	0	0	44.5656	39.0335	86.2845	43.449	39.1432	20.0902	20.8787	14.767	62.3544	27.0457	188.529	742.517	341.161	38.9481	354.232	27.7743	23.3582	26.7113	13.6056	8.61356	11.2011	16.686	74.3695	87.9042	57.1868	83.283	35.1034	34.6768
SW1222_LOW	1	0	0	0	0	0	0	0	102.454	36.511	102.131	79.0169	40.9151	20.468	25.8736	15.2344	54.4685	24.0649	155.743	1007.8	453.714	47.2968	479.082	36.3053	12.4015	28.7235	31.9701	10.0636	13.8734	15.6036	70.7511	94.528	45.2266	70.3867	32.2221	30.5962
SW1417	1	3	2.14801	1.01111	1.93742	0.928554	2.18726	0.822457	32.234	49.8265	64.1132	15.0164	41.3453	20.3262	23.3581	16.1168	50.6918	25.7065	477.872	30.8062	763.492	50.0449	790.455	47.541	26.6778	11.9063	48.5325	26.4993	25.9883	26.0538	90.3329	85.2159	104.985	54.9139	30.88	31.6466
SW1463	1	0	0	0	0	0	0	0	14.974	28.596	96.0624	12.139	42.1579	23.3623	22.7648	16.2421	64.5578	34.5734	408.624	792.71	323.083	54.9794	438.913	74.0332	55.3193	13.4206	15.2593	10.3477	13.0057	13.2613	102.928	106.845	83.9862	76.934	27.6491	23.5873
SW403	1	3	1.90987	0.844444	1.90212	2.03292	1.80998	1.08527	17.2466	39.1172	82.9661	14.5948	44.6055	22.1745	21.0864	10.7534	76.6126	29.9593	220.851	1740.28	361.439	38.6083	379.627	39.9635	64.3273	9.84581	27.9538	13.7409	7.86976	17.8982	86.406	95.9167	61.5292	72.3008	37.2369	34.0927
SW48	2	3	3.14801	2.01111	0.937418	0.928554	1.18726	2.82246	57.7632	37.6871	102.857	58.7493	36.4668	23.9705	30.9612	14.4922	68.4619	25.7648	87.0251	732.924	583.719	41.1694	560.605	35.8043	39.0703	10.5053	45.372	32.9092	19.7755	16.3913	96.1164	112.19	78.6154	95.7101	38.9694	43.8356
SW480	1	2	1.90987	0.844444	0.902124	2.03292	1.80998	1.08527	89.0498	33.7869	114.884	257.176	37.0985	25.1366	25.032	10.2306	71.8412	25.993	549.304	169.47	348.417	42.8048	354.59	42.0082	32.2027	8.88043	154.234	97.2705	413.006	83.6069	89.5034	94.7786	81.35	90.5643	38.5425	28.7632
SW620	1	2	1.90987	0.844444	0.902124	2.03292	1.80998	1.08527	18.9807	31.3173	82.9638	14.0206	30.621	21.368	18.1598	13.7276	66.6129	29.0999	447.018	82.264	109.951	35.0036	123.645	23.3881	33.9743	10.8002	39.7596	21.1262	63.5073	21.3012	98.0102	114.793	95.3922	97.9688	28.9417	31.7737
SW837	1	3	1.90987	0.844444	0.902124	2.03292	1.80998	1.08527	24.1234	38.3597	98.0952	48.9301	59.7597	25.0578	20.5126	16.189	72.2312	28.4278	75.1901	108.702	301.763	42.3717	334.543	40.1565	47.482	10.2934	37.6555	12.8037	7.9019	12.8265	115.052	118.874	74.1364	103.558	57.9915	41.8371
SW948	1	2	1.90987	0.844444	0.902124	3.03292	1.80998	2.08527	11.9064	33.8854	85.7349	31.8043	36.4551	26.4653	18.5015	10.6976	57.1943	25.9865	113.1	2130.68	345.2	41.1101	349.646	50.956	41.2279	87.1918	57.311	46.9834	205.998	44.0534	85.5508	91.854	70.1451	97.1889	32.8097	31.5336
T84	1	2	1.90987	0.844444	0.902124	2.03292	1.80998	2.08527	16.5297	34.0591	77.8832	18.4288	38.7528	18.4732	19.5242	10.0572	59.0907	34.0417	312.955	837.834	278.721	38.9851	297.068	28.6553	54.7926	8.93563	27.7232	16.8225	8.71729	16.1357	94.2225	104.517	76.7577	96.9904	31.7033	29.9495
TTITKB	0	0	0	0	0	0	0	0	348.854	35.3133	83.6596	9.99128	47.4202	27.9348	25.9523	16.2819	97.5128	21.0651	118.44	144.989	742.316	37.9301	838.124	47.9248	124.034	12.0273	87.3406	31.5971	44.025	21.7607	99.87	122.646	46.9229	91.0691	36.2671	37.5034
Vaco10MS	1	3	2.90987	0.844444	0.902124	1.03292	1.80998	1.08527	13.104	38.7112	63.6858	13.8406	37.3302	30.6159	19.9034	15.815	71.2679	29.4362	189.637	978.21	821.667	50.0275	876.561	41.7991	54.4704	8.64011	19.1799	22.5737	13.0499	9.59192	67.2462	91.1556	73.3152	82.3696	38.6882	26.1009
VACO400_12	1	0	0	0	0	0	0	0	13.6442	24.9364	87.3545	247.547	50.7104	22.1202	23.6723	10.6853	54.7585	28.3024	94.7248	328.486	267.279	35.5542	270.856	29.2956	38.2795	13.021	213.728	94.6998	145.852	39.5137	92.5666	85.6018	59.5063	91.8011	28.7203	40.0389
VACO400_5	1	0	0	0	0	0	0	0	13.1422	30.8543	90.3561	163.349	42.3036	20.2836	21.1781	21.3408	49.555	25.5454	124.033	450.305	477.643	46.6741	517.434	59.505	42.9701	12.5256	154.858	59.5942	55.5444	28.6124	82.6092	110.763	99.3653	108.005	41.7036	48.2973
VACO429	1	2	1.94213	1.14444	1.16046	1.03853	2.00277	3.09228	59.1789	33.5979	83.516	13.4429	55.5221	19.1873	21.5519	13.1887	78.1883	24.7987	89.6965	153.003	819.824	28.1341	1102.22	30.8744	113.862	12.763	51.0939	20.0407	28.9729	21.9917	80.5035	70.8777	61.7317	64.0879	33.6763	39.8213
VACO4A	1	3	1.94213	1.14444	1.16046	2.03853	2.00277	1.09228	540.904	34.2464	89.1294	20.6715	34.4956	23.7937	26.2628	15.0304	50.3099	29.1087	293.58	432.681	149.845	42.9814	157.163	36.5738	20.3452	12.9903	48.1132	17.6304	11.5659	18.7507	93.1665	98.8624	58.4597	68.0796	33.7262	38.0615
VACO4S	1	3	1.94213	1.14444	1.16046	2.03853	2.00277	1.09228	2051.27	44.1454	105.955	28.8926	35.6018	19.0793	26.2019	16.1959	77.7618	25.7539	370.649	303.163	450.162	48.8014	453.683	54.6811	28.1164	9.70138	54.4923	23.6584	14.598	23.4038	111.906	126.517	77.4863	91.8864	47.7507	24.8073
Vaco5	2	3	2.14801	1.01111	1.93742	1.92855	2.18726	1.82246	33.3376	27.9386	74.561	82.6985	42.6611	22.5717	24.0506	19.2947	48.6042	25.3883	141.084	2099.17	328.439	46.3903	312.095	34.6634	29.6221	237.86	36.0828	25.8548	17.3233	55.9455	65.1508	80.4031	61.4751	57.5762	30.1154	27.2701
WIDR	1	2	2.14801	1.01111	1.93742	0.928554	2.18726	0.822457	41.9186	32.8145	94.6578	12.3694	38.55	20.6987	26.1355	28.8676	69.8085	23.5872	560.768	676.464	435.238	36.4167	414.814	33.3591	37.829	14.1534	48.8437	24.2902	15.6796	20.7717	145.292	107.75	81.9652	71.1499	36.1299	45.6366
C2284	0	0	0	0	0	0	0	0	55.689	44.3407	85.1185	22.6769	42.5911	21.6085	16.7834	5.59481	51.8097	27.9357	255.691	167.519	364.342	42.7695	428.051	34.9706	28.614	12.5418	30.8716	18.2362	21.7075	23.9509	65.0357	98.1094	63.1311	91.5965	60.2521	31.6853
C105251	0	0	0	0	0	0	0	0	47.3086	27.7301	105.976	24.4249	54.4311	22.8267	19.9668	8.66819	68.4643	27.545	153.737	259.901	476.522	43.3984	533.125	62.8439	181.696	18.74	34.5209	18.871	19.2755	16.9065	132.601	107.654	67.682	84.7076	24.318	34.9573
C3953	0	0	0	0	0	0	0	0	37.5567	33.8161	80.4678	23.2508	32.0344	24.0376	52.2634	160.463	78.3374	22.9501	155.85	567.03	153.819	41.4161	152.703	25.9302	22.0949	13.1833	20.782	15.3837	19.6115	20.6572	96.0937	93.7548	89.722	80.5158	38.0712	44.8262
C4054	0	0	0	0	0	0	0	0	50.0924	37.5557	94.5719	21.8932	46.3115	20.2245	21.1687	10.6418	77.3656	25.8072	163.909	1171.95	414.265	43.8514	472.497	30.4055	38.2071	11.7081	441.32	181.483	350.34	56.8323	96.9575	97.6291	79.0641	94.5601	31.521	37.3304
