# Supplementary material for: Solute exchange through gap junctions lessens the adverse effects of inactivating mutations in metabolite-handling genes
Source: eLife. 2022 Sep 15;11:e78425. doi: 10.7554/eLife.78425 (PMC9534548; doi:10.7554/eLife.78425)
Supplement: Figure 2—source data 1. [file elife-78425-fig2-data1.xlsx]

## Sheet: FRAP and CBX
LS174T	LS174T+CBX	OXCO1	OXCO1+CBX	CC20	CC20+CBX	CACO2	CACO2+CBX	LOVO	LOVO+CBX	C10	C10+ CBX	SW1222	SW1222+CBX	HT29	HT29+CBX	DLD1	DLD1+CBX	SNU1235	SNU+CBX	SW948	SW948 +CBX	HDC9	HDC9+CBX	NCIH747	NCIH747+CBX	HCT116	HCT116 +CBX
0.0004	0	0.0035	0.0002	0.0018	-0.0008	0.036082	0	0.0016	0.00092547	0.0041175	0.00044553	0.007398	0.0007624	0.0036	-0.0009297	-0.00083911	0.00082492	0.011049	0.0014007	0.0003	0.0014	0.0014	-0.0006	-0.0009	0	0.001	0.0006
0.0028	0.0017	0	0.0005	0.0024	-0.0001	-0.00063844	0	0.0001233	-0.00051735	0.00050103	-0.00096589	0.006148	0.0002093	-0.0024249	-0.00035171	0.0015027	0	0.013048	-0.0017776	0.0257	0.0014	0.0027	0.0004	0.0005	0.0004	0.0009	0.0001
-0.0001	0.0017	0.0018	0.0002	0.0018	0.0001	-0.00012681	0.00029769	0.0186	0.00016326	0.0030002	0.00041244	0.003448	0.0002489	-0.00068978	-0.001104	0.0028067	0.0026385	0.027824	0	0.0304	0.0001	0.0002	-0.0025	-0.0004	0.0008	0.0017	0.0013
0.0009	0.0005	0.0004	-0.0004	0.0009	-0.0003	0.00015842	0	-0.0053	0.0012344	0.0001858	0.00094697	0.005865	0.0003699	-0.0008185	-0.00042768	0.002737	0.001304	0.024243	0.00028326	0.0068	0.002	-0.0022	0.0014	0.0017	0.001	0.0001	0.0007
0.0008	-0.0001	-0.0004	0	0.002	0.0002	0.015785	0	0.0111	0.00040283	0.0004746	0	0.02092	0.0005034	0.0007	0.00041315	0.016883	0.0014051	0.0074363	0.00022168	0.0169	0.0031	0.0031	-0.001	-0.0008	0.0024	0.0022	-0.0007
0.0039	0.0003	0.0028		0	-0.0003	0.00029416	0.0013444	0.018	0.00042889	0.002722	-0.0016683	-0.00718	0.0005113	-0.00048455	-0.0008763	-0.0010444	-0.0010417	0.028057	0.00079963	0.0195	-0.0003	0.0012	0.0008	0.0006	0.0003	0.0011	0.0006
-0.0012	-0.0004	-0.0018		0.0006	0.0006	0	0.00090366	0.0009	0	0.0015015	-0.00092875	0.02399	-3.51e-05	-0.0002	0.0009347	0.033292	0.00012117	0.0088273	0.00092539	0.0216	0.0014	0.0006	0.0013	-0.0001	0.0003	0.0029	0.0008
0.0034	-0.0016	0.0009		0.0002	-0.0002	0.00012116	0	0.0008	0.00034986	0.0028723	-0.00036465	0.000394	0.007686	0.0046	0.0006154	0.058585	0.0003807	0.013543	0.00020269	0.0015	0.0014	0.0015	0.0025	-0.0008	0.0002	0.003	0.0003
0.0012	0	-0.0021		-0.0002	0	0.02281	0.0015343	0.0013	0.00013439	0.0001316	0.00047121	-0.00427	0.002332	0.0115	0.0009933	0.010426	0.0012373	0.052869	0.0025595	0.0257	0.0001	0.0014	0.0001	0.0007	0.0009	0.0004	-0.0007
0	0.0003	-0.0005		0.0013	-0.0003	0.032598	0.0013346	0.0048	0.0004	0.0013662	0.00236	0.022814	0.000341	0.0044	0.0006642	0.0031003	-0.00048794	0.01139	0.0012047	0.0085	0.002	-0.0004	-0.0001	-0.0016	-0.0001	0.0019	0.0007
0	0.0039	0.0004		0.0024	0.0003	0.010879	0.001599	0.0402	0.0003	9.3646e-05	0.0017717	0.003708	0.003259	0.0008	0.0003266	0.01015	-0.00041999	0.0013	-0.0023176	0.033	0.0031	0.0023	-0.0051	-0.0001		0.0003	0.0011
0	0.0019	-0.0004		0.0008	0.0014	-0.0012866	0	0.0154	-0.0013	0.00021587	-0.00048731	0.002961	0.007766	0.0157	-0.0057	0.0040642	0	0.0058		0.0098	-0.0003	0.0266	0.0008	0.0004		0.0015	0.0016
-0.0007		-0.0009		0.0007	-0.0001	0.00066233	0	0.0024	0.0006	0.0017637	0.00038909	-3e-05	-0.00557	0.0019	-0.0062	0.004678	-0.00072163	0.0019		0.0038		0.0001	-0.0025	-0.0002		0.0008	0.0004
0.0028		-0.0024		0.001	0.0003	0.019022	0.00049443	0.0022	-0.0004	0.0014795	0.00044723	0.013215	-0.00287	0.0195	-0.0028	0.049057	-0.00046647	0.0017		0.0073		0.0008	0.0008	-0.0012		0.001	0.0011
0.0009		0.0015		-0.0015	-0.0014	-0.00040355	0	0.0024	0.0008	-0.0011477	-0.00046972	0.013528	0.003446	0.0152	-0.0002	0.0014384	0.00014497	0.0032		0.0005		-0.0008	0.0002	0.0025		0.002	-0.0001
-0.0012		-0.0009		-0.0003		0.0034035	-0.0021243	0.0025	0.0006	0	0.00051461	0.001737	0.005635	0.015	-0.001	0.0014848	-0.00041353	0.0008		0.0022		0.0004	0.0009	-0.0005		0.0009	0.0003
0.0004		-0.0006		-0.0018		0.0038407	0	0.0029	0.0009	0.00059773	-0.0013	-0.00169	0.008168	0.0017	-0.0002	0.00096473	-0.00036254	0.0029		0.0115		0.0052	0.0013	-0.0008		0.0003	0.0008
0.0014		-0.0042		-0.0009		0.034161	-0.00036494	0.0369	0.001	0.00058604	0.0006	0.003721	0.003749	-0.0006	-0.0022	0.00039199	0.00030982	0.0212		0.0074		0.0323		-0.0023		0.0001	0.0008
0.0013		0.0003		-0.0002		0.00015842	0	0.0026	-0.0008	0	-0.004	0.019879	0.005518	0.0063	-0.0003	0.00010838	-0.00058994	0.0077		0.005		0.003		0.0008		0.0017	0.0011
0.0012		0.0012		-0.0015		0.00072463	0	0.0029	0.0006	0.0010181	0.0012	0.013604	0.006965	0.024	-0.0011	-0.00039039	0	0.0112		0.0003		0.0083		0.0021		0.0003
0.0051		0.0004		0.0011		0.00024865	0	-0.0003	-0.0013	0.001345	0.0014	0.00752	0.002614	0.0106	0.0007	1.1122e-05	-0.0008772	0.003205		0.0257		0.001		0.001		0.0021
-0.0005		0.0023		-0.0007		-0.00050984	-0.0006	0.0036	-0.0018	0.00047555	0.0037	0.009563	0.003398	0.0011	0.0002	0.0042603	0.0011	0.002102		0.0304		0.0025		0.0004		0.0016
0.0004		0.0004		-0.0009		0.00014347	-0.0013	-0.0015	-0.0009	0.00061226	0.0012	-0.00011		0.007	-0.0006	0.0042947	-0.0002	0.0051149		0.0068		-0.001		0.0001		-0.0003
0.0012		-0.0007		0.0003		-0.00060612	0.0009	0.0036		0.0004659	0.0025	0.007984		0.0008	-0.0006	0.005481	0.0002	0.018106		0.0169		-0.0003		0.0001		0.0007
-0.001		0.0013		-0.0002		0.0020386	-0.0006	-0.0012		0.00029646	0.0023	0.010927		-0.0002	-0.0007	0.014243	0.0004	0.021385		0.0195		0.037		-0.0001		0.0011
0.0013		0.0004		-0.0016		0.00013044		0.0011		9.3646e-05		9.1e-05		0.0049	0.0011	0.030888	-0.0003	0.0061724		0.0216		0.0001		-0.0002		0.0003
0.0029		0.0007		0.0008		0.00056606		0.0052		0.014501		0.004357		0.0003	-0.0008	0.004894	-0.0008	0.0044012		0.0015		0.0017		-0.0002		0.0015
0.0006				0.0003		0.002668		0.0053		0.00026269		-0.00365		-0.0004	0.0005	0.015736	0.0003	0.004413		0.0257		0.0009				0.0007
0.0008				0.0004		0.00030316		-0.0014		0.00033504		-0.00298		-0.0001	0.0005	0.0087074		0.016584		0.0085		-0.0008				0.0015
-0.0017				-0.0018		0.033298		0		0.0014565		-0.00768		0	0.0005	0.0046003		0.019697		0.033		-0.0004				0.0004
-0.0019				0.001		0.00067134		-0.0006		0.00028476		-0.00178		0.0008	0.0003	0.0082647		0.0030693		0.0098		0.0017				0
				-0.0005		0.00093042		-0.0004		0.0046028		-0.00424		-0.0009	0	0.040533		0.0091339		0.0038		-0.0045				0.0007
				-0.0005		0.00050496		-0.003		0.0018506		0.002655		0.0077	-0.0029	0.015083		0.0072089		0.0073		-0.0022				-0.0004
				0.0002		0.062209		0.0001		0.0016231		-0.00537		0.0037	-0.0017	0.010404		0.00247		0.0005		0				0.00068
				-0.0005		-0.00071255		-0.0001		0.0038194		0.007162		0.0103	0.0012	0.03237		0.0047416		0.0022		-0.0019				0.0007
				0.0004		0.00038807		0.0004		0.0017931		3.6e-05		0.0036	-0.0016	0.018391		0.0035243		0.0115		-0.0025
				-0.0008		0.0017837		-0.0013		0.0025375		0.014422		0.0051	0.0006	0.01595		0.014603		0.0074		0.0032
				0.0001		0.0036879		-0.0006		0.0035721		-0.00385		-0.0008	-0.0031	0.021248		0.0078938		0.005		-0.0008
				-0.0001		0.00089102		-0.0016		0.0024951		0.018138		0.0007	-0.0017	0.011833		0.027568				0.0012
				-0.0023		-0.00015359		0.0018		0.0032427		0.035795		-0.005	-0.0015	0.0025831		0.0158				-0.0003
				-0.0007		0		0.0033		0.0024019		0.005623		0	-0.0033	0.010701		0.0048				-0.0023
				-0.0004		0.0011572		0		0.001		0.011982		-0.0007		0.0017603		0.0049				0.0003
				0.0002		-0.00095569		-0.0019		-0.0017		0.006685		0.0116		0.00373		0.004				0
				-0.0012		0.066488		-0.0009		0.0053		0.048684		-0.0017		0.041279		0.0228				0.0002
				-0.0016		0		0.0001		0.0006		0.013619		0.0002		0.024716		0.0058				0.0033
				-0.0008		-0.0024199		-0.0015		0.0025				0.0018		0.0039798		0.0031				0.0018
				-0.0044		-0.0019949		-0.002		-0.0007				-0.0005		0.0078832		0.0351				0.0007
				-0.0002		-0.0022825		-0.0019		0.0041				0.0257		0.02367		0.0245				-0.0005
				-0.0021		-0.00074988		0.0029		0.0019				-0.0019		0.00056846		0.0072
				-0.0009		-0.00044753		-0.0014		-0.0007				0.0003		0.0022971		0.0048
				0.0002		-0.0011567		-0.0052		0.0027				0.0046		0.023302		0.0682
				-0.0012		0.0017973		0.0458		0.0014				0.0011		0.0305		0.0151
				-0.0028		0		-0.0025		0.0006				0.0039		0.0404		0.0383
				-0.0008		-0.00055584		-0.0008		0.0003				0.0006		0.0144		0.0339
						0.0018409		-0.0057		0.0003				0		0.0131		0.0166
						0.032643		-0.0055		-0.0007				-0.0001		0.0228		0.0149
						0.0007								0.0008		0.0605		0.0137
						-0.0005				0.0025				0.0069		0.0062		0.0035
						-0.0009				0.0025				-0.0023		0.0426		0.0066
						-0.0014				0.0031				-0.0012		0.0146		0.0153
						-0.0008				0.0044				0.0002		0.0238		0.0106
						0.0002				0.0031				-0.0001
						-0.0011				-0.0014				0.0007
						0.0001				0.0002				0.0044
						-0.0003				-0.0006				0.0003
						0				0.0019				0
						0.0004				0.0012				-0.0013
										-0.0031				-0.0082
										0.001				-0.0071
										0.0014				0.0069
														0.0007
														-0.0016
														-0.0043
														-0.0019
														0.0007
														0.0003
														0.0062
														0.0076
														0.0005

## Sheet: siRNA
Caco2	Caco2	Caco2	Caco2	SW1222	SW1222	SW1222	Lovo	Lovo	Lovo	Lovo	HT29	HT29	HT29	DLD1	DLD1	DLD1	SNU1235	SNU1235	SNU1235
ctrl CACO2	siRNA Cx26	siRNA Cx31	siRNA Cx43	siRNA NT	siRNA Cx26	siRNA Cx31	siRNA NT	siRNA Cx26	siRNA Cx31	siRNA Cx43	siRNA NT	siRNA Cx26	siRNA Cx31	siRNA NT	siRNA Cx26	siRNA Cx31	siRNA NT	siRNA Cx26	siRNA Cx31
Scr	GJB2	GJB3	GJA1	Scr	GJB2	GJB3	Scr	GJB2	GJB3	GJA1	Scr	GJB2	GJB3	Scr	GJB2	GJB3	Scr	GJB2	GJB3
0.0002	-0.0013	0.0006	-0.0005	0.001	2e-05	-0.0015	0.0036	0.0009	0.0114	0.014	0.0014	-0.001	0.0048	0.0005	0.0026	0.0007	0.0045	0.0021	0.0173
0.0001	0.0008	0.0005	0.0001	0.0054	0.0021	-0.0008	0.0031	0.0017	0.0109	0.0024	0.0036	-0.0006	0.0022	0.0029	0.0005	0.0053	0.0037	0.0008	0.0216
-0.0002	0.001	0.0006	0.0002	0.0005	-0.0002	0.0007	0.0066	0.0015	0.0034	0.0129	0.0097	0.0004	0.0004	0.0004	-0.0002	0.0079	0.0014	-0.0018	0.0056
0.002	-0.0004	-0.0003	0.0003	0.006	-0.00384	0.0071	0.0021	0.0013	0.0059	0.0016	0.0003	-0.0002	0.0019	0.0002	-0.0004	0.0018	0.0012	0.0002	0.0333
0.0003	0.0004	-0.0002	0.0002	0.0047	0.00567	0.0024	0.0131	0.0003	0.0025	0.0074	0.0028	0	0.0009	0.0037	-0.0008	0.0116	0.001	0.0018	0.0071
0.0009	0.0012	0	-0.0008	0.0032	-0.00641	-0.0007	0.0248	0.0039	0.0072	0.0013	0.0033	-0.0022	0.001	0.0026	0.0007	0.0005	0.0007	0.0001	-0.0005
0.0009	-0.0001	0.0005	-0.0002	0.0012	0.00674	0.004219	0.0007	0.0006	0.0112	0.0083	0.0008	-0.0037	0.0015	0.0064	0.001	0.0015	-0.0002	0.0014	-0.0006
0.0017	-0.0002	0.0016	0.0003	0.0013	0.000299	0.031338	0.0022	0.0055	0.0013	0.0254	-0.0007	0.0002	0.0017	0.002	0.0005	0.0142	0.0001	0.0002	0.0184
0.0005	0.0001	0.0015	0.0001	0.0004	-0.00211	0.002696	0.0066	0.0011	0.0035	0.0054	0.0035	-0.0013	-0.0003	0.009	0.0007	0.0053	0.0017	0.0006	0.0223
0.0015	0.0004	0.0003	-0.0007	0.00871	-0.00511	0.014274	0.0049	0.0002	0.0017	0.0088	0.0109	-0.0019	0.0049	-0.0014	-0.001	0.0016	0.0002	0.0026	0.0013
0.0005	-0.0007	-0.0003	0	0.010108	0.001179	0.008308	0.0133	-0.0016	0.0046	0.0052	0.0199	0.0008	0.0017	-0.0019	-0.0001	0.0077	0.0031	0.0009	-0.0009
-0.0002	0.0003	0.0004	0.0001	0.004447	-0.0018	0.039226	0.0051	0	0.0052	0.014	0.0071	0.0019	-0.001	0.0028	0.0001	0.0089	0	-0.001	0.0002
-0.0002	0.0006	0.0009	-0.0002	0.002591	-0.00836	0.016089	0.0063		0.003	0.0106	0.0044	0.0005	-0.0005	0.001	0.0005	0.0093	0.0045	0.0013	0.0037
0	0.0009	0.0002	0	-0.00033	-0.00124	0.011745	0.0061		0.0002	0.0058	0.013		0.0036	0.0021	-0.001	0.0072	0.001	-0.0003	0.0261
0.002	0	0.0004	-0.0003	0.049407	0.001717	0.007746	0.0012		0.0061	0.0088	-0.0001		0.0005	0.0202	-0.0004	0.0193	0.0046	0	-0.0011
0.0003	0.0038	0.0002	-0.0007	0.007023	0.000153	0.014434	0.0003		0.0049		0.0008		0.0019	0.0054	0.0004	0.0199	0.0092	0.0005	0.0008
0.0004	0.0002	0.0001	-0.0002	0.006202	0.001549	0.010954	0.0024				0.0092		0.019	0.0004	0.0014	0.0102	0.0092	-0.0008	0.0011
0.0014	0.0002	0.0003	0.0001	0.024573	0.005671	0.007335	0.0021				0.0009		0.0119	0.0191	0.0005	0.0005	0.0094	0.0003	0.0502
0.0005	0	-0.0002	-0.0007	0.033498	0.013137	0.001448	0.0235				0.0078		-0.0006	0.0015	-0.0002	0.0088	-0.0001	0.0009	0.0225
0.0014	0.0003	0.0006	0	-0.00677	-0.00256	0.006836	0.0001				0.0011		0.011	0.0011	0	0.0323	0.0003	-0.0014	0.0076
-0.0003	0.0001	-0.0004	0.0002	-0.01576	-0.00623	0.025376	0.0005				0.0026		-0.0008	0.0071	0.0002	-0.0007	-0.001	0.0002	0.0316
	0.0003	0.0012	0.0004	-0.00536	0.002621	0.009945	0.0103				0.0021		0.0009	0.0028	0	0.0037	-0.0004	-0.0014	-0.0031
	0.0003		-0.0005	0.010289	0.000485	0.005063	0.001				0.0021		0.0013	0.0002	-0.0002	0.0078	0.0028	-0.0024	0.0001
	0.0004		-0.0005		0.01325	0.013736	0.0032				0.0002		0.0053	0.0034	-0.0002	0.002	0.0088	-0.0026	0.0036
	0.0013		-0.0011		0.012839	0.005457	0.0106				0.0007		0.0053	0.013	0.0005	0.0043	0.0015	-0.002	0.0032
	0		0.0005		0.00213	0.006266	0.0024				-0.0001		0.0013	0.0018	0.0006	0.0352	0.0006	-0.0026	0.0203
	-0.0004		-0.0001		0.005691		0.001				0.0007		0.0001	0.0021	0	0.0013	0.0071	-0.0018	0.0029
	0.0005		-0.0006		0.006921		0.0016				0.001		0	0.0094	-0.001	0.0073	-0.0005	-0.0016	0.0026
	0.0006		-0.0005		0.003588		0.0104				-0.0008		0.0111	0.002	0	0.0044	-0.001	-0.0026	0.0032
	0.0006		0.0005		-0.00141						0.0118		0.0076		0.0004	0.0075	-0.0015	-0.002	-0.0024
	-0.0001		0.0011		0.002133						0.0038		0.0009		0.0012	0.007	0.0015	0.002	-0.0029
	0		0.0018		-0.00257						0.0245		0.0015			0.0422	0.0055	0.0005	0.0002
	-0.0002		0.001		-0.00229						0.0048		-0.0006			0.0071	-0.0002	-0.0022	-0.0026
	0.0002		0.0008		0.008205						0.0039		0.0018			0.0247	0.0082		0.0026
	-0.0002		0.0003		0.000841						0.005		0.0024			0.0062	0.0049
	0.0001		0.001		-0.00419						0.006						0.0079
	0.002		0.0002		-0.00013						0.0134						-0.0015
	0.0008		0.0005								0.0055						0.002
	0.0009		0.0005								0.0038						0.0161
	0.0009		0.0003								-0.0016						-0.0013
	0.0006		0.0006								0.0049						-0.0011
	0.0013		0.0003								-0.0008
	0.0005		0								0.0008
	0.0013										0.0019
	0.0012										-0.0013
	0.0013										-0.0005
	0.0004										-0.0017
	0.0004										-0.0013
	0.0013										-0.0012
	0.0017
	0.0007
	0.0004
	0.0013
	0.0004
