# Supplementary material for: Solute exchange through gap junctions lessens the adverse effects of inactivating mutations in metabolite-handling genes
Source: eLife. 2022 Sep 15;11:e78425. doi: 10.7554/eLife.78425 (PMC9534548; doi:10.7554/eLife.78425)
Supplement: Figure 3—source data 1. [file elife-78425-fig3-data1.xlsx]

## Sheet: Summary permeability
LOVO	V	G	O	DR		DLD	V	G	O	DR	Calcein
MW	334	465	550	698			334	465	550	698	622
sqrtMW	18.2757	21.5639	23.4521	26.4197			18.2757	21.5639	23.4521	26.4197	24.9399
	0.120572	0.0491697	0.0395857	0.0185893			0.0979914	0.0646096	0.0529465	0.0270004	0.0374
	0.0119092	0.00376537	0.00359562	0.00399815			0.00443425	0.00307202	0.00336503	0.00335594	0.0124852
	3	18	15	9			18	15	21	63	31
		0.0911103	0.0417716	0.013362						0.0122901
		0.0444285	0.0315618	0.00987328						0.0114993	0.00751529
		0.0444213	0.0464779	0.00564375						0.00967674	0.400321
		0.0350833	0.0486666	0.0170945						0.0191197	0.0104679
		0.0611074	0.0515457	0.0123802						0.0143016	0.0338014
		0.0554065	0.0364513	0.00988765						0.0261278	0.0150675
		0.0316017	0.0335835							0.0243137	0.00957522
		0.0262684	0.0282745							0.0114178	0.0183007
		0.0367597	0.0309602							0.00857258	-0.000982882
		0.0465806	0.075256							0.0126631	0.0221999
		0.0644825	0.0320872							0.0144464	0.0933661
		0.0393292	0.0232021							0.0217993	0.0162696
		0.0712667	0.0371336							0.0133702	0.0125408
		0.0526782	0.0545128							0.017837	0.0275788
		0.0357493	0.0223007							0.190453	0.0383827
		0.0588757								0.0156682	0.00978081
		0.0418708								0.0123045
		0.0480341								0.0123894
	0.106262			0.036671						0.0312381
	0.111238			0.0389012						0.00900261
	0.144217			0.0234904						0.0277719
										0.0219941
										0.0098281
										0.0120023
										0.0112698
										0.0206679
										0.0290232
							0.0804239			0.0268173	0.0265507
							0.100565			0.0339335	0.0142434
							0.0766071			0.0472876	0.0256419
							0.135223			0.0305947	0.0186992
							0.075275			0.0292957	0.0366354
							0.0991875			0.0317365	0.0233726
							0.124246			0.0742347	0.0170518
							0.115517			0.0821367	0.0334246
							0.0847074			0.0435239	0.0411276
							0.0716004			0.0906451	0.00996138
							0.0834982			0.0498274	0.0436636
							0.11184			0.0568193	0.0398167
							0.0924905			0.0185671	0.0220699
							0.11279			0.0281782	0.0180543
							0.111918			0.0234145	0.0332151
							0.116158				0.0416858
							0.0845461
							0.0872528
								0.0797875	0.0507884	0.0175672
								0.065491	0.0410743	0.0170754
								0.0724085	0.0612045	0.0152167
								0.0590887	0.0351972	0.0110603
								0.0505588	0.0467278	0.0130761
								0.0600667	0.0216273	0.0124685
								0.0501418	0.0369522	0.0186791
								0.0633675	0.0404818	0.0203559
								0.0552161	0.0548739	0.0193346
								0.0761725	0.0497551	0.022932
								0.0465004	0.0590571	0.0171724
								0.0712791	0.0532542	0.0276286
								0.0782388	0.057657	0.0215779
								0.0565752	0.0391905	0.0257342
								0.0842512	0.0652414	0.0235159
									0.0521709	0.0196275
									0.0616467	0.0299829
									0.0624362	0.028553
									0.0849888	0.0210905
									0.0873249	0.011953
									0.050227	0.0183656
