# Supplementary material for: Solute exchange through gap junctions lessens the adverse effects of inactivating mutations in metabolite-handling genes
Source: eLife. 2022 Sep 15;11:e78425. doi: 10.7554/eLife.78425 (PMC9534548; doi:10.7554/eLife.78425)
Supplement: Figure 3—source data 2. [file elife-78425-fig3-data2.xlsx]

## Sheet: Coupling coeff O and V
RKO	C10	HDC9	SW1222	HCT116	HT29	OXCO1	DLD1	DLD1-Cx26KO	SNU1235	Low OXCO1	Low DLD1
0.119237	0.163469	0.235252	0.164034	0.262289	0.272366	0.295162	0.340305	0.13422	0.243024	0.097531	0.087924
0.072521	0.184234	0.241429	0.280037	0.320177	0.239994	0.134551	0.294245	0.127998	0.232338	0.109635	0.085567
0.120172	0.148199	0.242835	0.092961	0.274029	0.275098	0.223408	0.24393	0.135079	0.225958	0.09284	0.085377
0.114923	0.165136	0.249134	0.156415	0.256676	0.221929	0.398101	0.149168	0.133561	0.223739	0.132076	0.077329
0.16445	0.123561	0.262986	0.150376	0.269003	0.243137	0.312113	0.241763	0.122442	0.182487	0.122196	0.110662
0.182587	0.150658	0.221417	0.158062	0.250807	0.266248	0.399393	0.188137	0.133801	0.24047	0.10114	0.078973
0.112777	0.120454	0.254813	0.173943	0.289372	0.219694	0.456003	0.344451	0.064726	0.219279	0.117091	0.074644
0.123278	0.117706	0.281888	0.179514	0.286602	0.283331	0.388723	0.218423	0.098183	0.20121	0.115368	0.112895
0.135053	0.138249	0.296602	0.136941	0.414501	0.278153	0.313839	0.161343	0.126831	0.240187	0.108239	0.08919
0.180716	0.26078	0.260225	0.184182	0.424161	0.238807	0.175521	0.200098	0.114212	0.228295	0.099671
0.133071	0.211337	0.25841	0.228744	0.277397	0.231785	0.212732	0.294211	0.092453	0.243524	0.087114
0.172315	0.220728	0.211709	0.181979	0.30116	0.253736	0.264371	0.211284	0.094029	0.254517	0.110051
	0.150665	0.337567	0.270876	0.305448	0.372718	0.160598	0.322483	0.111409	0.28013
	0.129497	0.257874	0.255918	0.293304	0.285272		0.256595	0.083503	0.234122
	0.264979	0.186844	0.222294	0.306553	0.355417		0.359407	0.106829	0.267388		0.110245
	0.169309	0.337277		0.290836	0.244281		0.353976	0.124465	0.252553		0.099274
	0.121365	0.274173		0.301014	0.207922		0.246186	0.114049	0.268666		0.152787
0.097891	0.115169	0.291219		0.280659			0.19029		0.24945	0.074224
0.085339	0.12409	0.245633		0.269935		0.204383	0.243684		0.211858	0.05363
0.082982	0.217572	0.321043		0.283051		0.199101	0.186189		0.23539	0.056468
0.0985	0.171312	0.240985	0.336056	0.283201		0.157007	0.30879		0.251696	0.061224
0.088201		0.366918	0.332643	0.292823		0.198614	0.232646		0.230292
0.090162		0.37274	0.377518		0.264065	0.183125	0.389934	0.062115
0.088884		0.248848	0.354894		0.113985	0.178865	0.336826	0.084625
0.093846		0.383414	0.27699		0.256155	0.216314	0.136526	0.075073
0.092202		0.247631	0.281071		0.100142	0.167237	0.18063	0.056209
	0.20171	0.439256	0.311979		0.266592	0.161594	0.225411	0.107911
	0.240943	0.265354		0.15452	0.092232	0.124407	0.208158	0.053776	0.250673
	0.229302	0.30968		0.140033	0.24513	0.155167	0.097388	0.106584	0.252988
	0.176124	0.248924		0.162707	0.11151	0.159295	0.147472	0.118284	0.215885
	0.199535	0.278972		0.094102	0.230685	0.233381	0.211422	0.093593	0.243729
0.058263	0.237945	0.293094		0.14776	0.099355	0.132029	0.220976	0.068571	0.204334
0.07313	0.167542	0.283671		0.146018	0.394399	0.150626	0.23271	0.104849	0.171364
0.068938	0.296405	0.202571		0.112811	0.169545	0.14125	0.218405	0.110826	0.232253
0.05896	0.220422	0.22518		0.138594	0.245436	0.143391	0.236904	0.092468	0.238736
0.05911	0.226475	0.218056		0.146898	0.101795		0.256143	0.102618	0.203166
0.071494	0.18476	0.216945		0.161649	0.230604		0.200098	0.058828	0.206819
	0.195536	0.215357		0.136869	0.305281				0.198534
	0.188673	0.239423		0.183539	0.133177				0.219464
	0.209307	0.23182		0.147477	0.44225				0.198721
		0.243395		0.170297	0.234972	0.328298			0.182286
		0.25426		0.213085	0.239412	0.319158			0.202888
		0.381197			0.42223	0.289494	0.308119		0.161236
		0.424485			0.219182	0.33925	0.323754		0.229407
		0.400745			0.455628	0.337912	0.166968		0.213764
	0.345797	0.257134			0.292624	0.313966	0.184016		0.281435
	0.338038	0.436144			0.290212	0.422825	0.208884		0.28231
	0.299854	0.284687		0.262577	0.107924		0.203695		0.289685
	0.322392	0.411253		0.334791	0.345347		0.187336		0.323082
	0.326307	0.314413		0.199374	0.153332		0.190398		0.22181
	0.32093	0.356946		0.291788	0.335654		0.179133
	0.325398	0.229753		0.210857	0.166083		0.194657
	0.323623	0.19553		0.346387	0.245361		0.191401
	0.330526	0.297148		0.252427	0.099358		0.188427
	0.319542	0.232382		0.255794	0.272373		0.178806
	0.339232	0.196034		0.262924	0.1089		0.177871		0.332063
	0.300218	0.170034		0.333516	0.300212		0.183196		0.422776
	0.31142	0.272189		0.327081	0.117978				0.381937
	0.307945	0.188817		0.300654	0.327413				0.338654
	0.356001	0.228461		0.252228	0.282209				0.49953
	0.334935	0.218847		0.258598	0.292612				0.411979
	0.357017	0.200997		0.298484	0.293238				0.488253
	0.368058	0.213877		0.283989	0.296388		0.259723
	0.334213	0.242493		0.215974	0.31103		0.235402
	0.324334	0.221629		0.297665	0.209336		0.254877
	0.291565	0.194104		0.243408	0.333734		0.446164
	0.320462			0.250014	0.226335		0.333481
	0.308983			0.233587	0.095141		0.433363
	0.307973				0.252975		0.303965		0.193433
					0.123812		0.303109		0.194304
					0.327627		0.314522		0.271325
		0.527434			0.246664		0.360787		0.24975
		0.421185					0.417831
		0.388181					0.377247
	0.267208	0.313381					0.3809
	0.516536	0.23718
	0.290486	0.446881
	0.559739	0.309439			0.243761
	0.259087	0.509077			0.286804
	0.501778	0.402667			0.28092
	0.259448	0.426267			0.287133		0.371585
	0.519294	0.35362			0.341347		0.379515
	0.203634	0.419446			0.306002		0.332869
	0.481426	0.437714			0.380747		0.345765
	0.304247	0.311832			0.332413		0.339896
	0.2433	0.414315			0.350983		0.433182
	0.514531	0.312269			0.279248		0.334831
	0.309996	0.44561			0.271046		0.298119
	0.551715	0.381062			0.282476		0.380406
	0.265853	0.546114					0.388468
	0.56233	0.41815					0.378092
	0.353958	0.455262					0.449446
	0.634004	0.267617					0.435153
	0.281898	0.348741					0.410571
	0.278149	0.301322			0.196136		0.306409
	0.577043	0.388639			0.15011		0.372872
	0.29115	0.361782			0.117656		0.376844
	0.19377	0.383436			0.130473		0.459934
	0.363246	0.240535			0.219752		0.30347
	0.252307	0.318222			0.157769		0.533277
	0.46516	0.20919			0.219326		0.479112
	0.223941	0.423989			0.18897		0.529409
	0.414214	0.247125			0.195085		0.480993
	0.245906	0.337175			0.172233		0.385341
	0.447652	0.237606			0.190246		0.432565
	0.358241	0.349864			0.204424		0.487656
	0.471965	0.235762			0.164585		0.217142
	0.179732	0.386236			0.19616		0.157317
	0.415852	0.255473			0.142195		0.237339
	0.390949	0.334145			0.144965		0.130567
	0.267945	0.232845			0.15587		0.156476
	0.243463	0.454828			0.210821		0.165383
	0.242939	0.414134			0.169906		0.229523
	0.415074	0.291583			0.168878		0.306831
	0.188393	0.32433			0.160046		0.279745
	0.403286	0.238374			0.177151		0.214721
	0.274785	0.284973			0.107556		0.237115
	0.463262	0.200931			0.098221		0.244746
	0.614172	0.385728			0.14647		0.216195
	0.556938	0.268244			0.141281		0.151878
	0.554744	0.499338			0.16442		0.187915
	0.453992	0.339255			0.12796		0.295894
	0.493704	0.449595			0.108209		0.213749
	0.420478	0.432032			0.083846		0.141808
	0.446354	0.324149			0.082084		0.435153
	0.435316	0.501071			0.114752		0.459934
		0.417665			0.15319		0.529409
		0.307567			0.10651		0.165383
		0.385238			0.074884		0.216195
		0.354941			0.07969		0.141808
		0.366329			0.104557
					0.120204
					0.123826
					0.18269
					0.126808
					0.132942
		0.335732
		0.273574
		0.33205
		0.295842
		0.268086
		0.289098
		0.287722
		0.325576
		0.351657
		0.363295
		0.421895
		0.372005
		0.350885
		0.303398
		0.383976
		0.269054
		0.38629

## Sheet: Coupling coeff O
RKO	C10	HDC9	SW1222	HCT116	HT29	OXCO1	DLD1	DLD1-Cx26KO	SNU1235	Low OXCO1	Low DLD1
0.001389	0.001349	0.00175	0.00577	0.001037	0.001974	0.001054	0.002536	0.000394	0.005623	0.000488	0.004925
0.001128	0.001712	0.002228	0.000878	0.001759	0.001368	0.000749	0.001318	0.001625	0.011765	0.00036	0.000325
0.000326	0.001814	0.003355	0.000778	0.00139	0.001426	0.001064	0.003205	0.001867	0.007619	0.000496	0.001511
0.000635	0.001666	0.002039	0.000379	0.001367	0.000956	0.000858	0.006072	0.000361	0.004345	0.000621	0.003426
0.001526	0.001847	0.002027	0.000137	0.001423	0.001803	0.000518	0.003135	0.002287	0.006997	0.000416	0.002842
	0.000989	0.003746		0.001142	0.00254	0.000504	0.002296		0.008091	0.000876
	0.002274	0.003118		0.001431	0.001586	0.000311	0.002616		0.008409	0.000814
	0.001401	0.002907		0.001552	0.001021	0.001505	0.001717		0.005259	0.00125
	0.002023	0.003866		0.001481		0.000651	0.002536
		0.040247					0.003205
		0.047136					0.003135
		0.027778
		0.012636
		0.004187
		0.033399									1.53e-05
		0.026131	0.0005								0.000722
			0.00152								0.001052
0.00336			0.003041							0.000316	0.001288
0.001433						0.009164				0.000267	0.002635
0.003038						0.020773				0.00139	0.002018
0.000748						0.001555				0.002859	0.009858
0.000706						0.00045				0.003118
					0.003509	0.000389		0.000686
					0.001542	0.001352		0.00119
					0.001367	0.001019		0.001845
					0.001518	0.000361		0.001257
	0.001349				0.000905			0.001616
	0.001712			0.009707	0.001217			0.00112	0.034585
	0.001814			0.009123	0.002069				0.001907
	0.001666			0.007364	0.002426				0.040995
	0.001847			0.006874	0.004026				0.000467
0.028478	0.000989			0.006599	0.001908				0.016698
0.041314	0.002274			0.006341	0.003867				0.027805
0.002815	0.001401			0.007764	0.001914				0.006146
	0.002023			0.008279	0.006462				0.000664
				0.006971	0.00178				0.020101
				0.0049					0.001601
									0.031808
									0.002907
									0.003336
						0.000227			0.028885
						0.000104			0.002742
						0.002088	1.53e-05		0.038202
						0.0048	0.000722		0.002545
						0.004051	0.001052
	0.001625					0.004241	0.001288
	0.000676						0.002635
	0.002399			0.004533			0.002018
	0.003407			0.003354			0.009858
	0.003332			0.002336
	0.003085			0.003364
	0.002974			0.003884
	0.003165			0.003184
	0.004233			0.00345
				0.005422
	0.002486			0.002357					0.003563
				0.003006					0.001635
									0.003054
									0.0019
									0.002503
									0.002647
									0.00249
							0.00177		0.003736
							0.000298
							8.83e-06
							0.000269
							4.08e-06
							3.21e-05
							0.00157		0.000586
							0.033376		0.016657
							0.016921		0.019244
		0.00112					0.000542		0.009152
		0.000608							0.026822
		0.000405
	0.002884	0.00032
	0.000882	0.000854
	0.001857	0.001071
	0.001962	0.001004			0.000303
	0.001907	0.000842			0.000294
	0.001599	0.001524			0.000522
	0.000455				0.000388		7.14e-05
	0.00308				0.009159		0.00021
					0.00734		0.000782
					0.003409		0.000293
					0.00301		8.78e-05
							0.000244
							0.001048
							0.001906
							0.000782
					0.000765
					0.002544
					0.001265
					0.001017
					0.001551
					0.000793
					0.001379
					0.001338
					0.001331
		0.003223
		0.002267
		0.001684
		0.003706
		0.0022
		0.009621
		0.034574
		0.013243
		0.006583
		0.005132
		0.021236
		0.019496
		0.019069
		0.039937
		0.040247
		0.047136
		0.027778
		0.012636
		0.004187
		0.033399
		0.026131

## Sheet: Coupling coeff V
RKO	C10	HDC9	SW1222	HCT116	HT29	OXCO1	DLD1	DLD1-Cx26KO	SNU1235	Low OXCO1	Low DLD1
2.37e-05	1.19e-06	0.000137	0.000116	1.17e-05	3.77e-05	1.56e-05	1.18e-05	0.000142	5.26e-05	1.85e-05	0.000308
3.19e-05	1.05e-06	0.000132	0.000714	1.71e-05	7.86e-05	2.41e-05	0.000224	0.001064	8.4e-05	8.14e-06	0.000949
0.000208	0	0.000147	0.000169	1.6e-05	0.000138	1.77e-05	2.93e-05	0.001822	0.000116	1.47e-05	0.000246
0.000149	2.89e-07	0.000151	0.000428	1.29e-05	4.84e-05	1.17e-05	1.13e-05	0.000127	7.48e-06	0.00012	0.000647
5.4e-05	3.59e-07	0.000179	0.000582	2.28e-05	0.000211	1.33e-05	1.59e-05	0.002371	5.98e-05	4.62e-05	0.004129
	1.11e-06	0.000147	0.000547	1.9e-05	0.000304	1.59e-05	1.37e-05	0.001078	0.000129	1.6e-05
	1.78e-06	0.0002		1.77e-05	0.000102	2.46e-05	3.33e-05	0.001739	4.23e-05	6.54e-05
	2.75e-07	0.000221		1.7e-05		1.01e-05	1.53e-05		7.51e-05	7.7e-06
		0.000148		1.52e-05		4.92e-06	3.66e-05		9.86e-05
		0.00015		1.01e-05			1.4e-05		0.000125
				1.73e-05			3.13e-05		7.48e-05
							3.64e-05
							2.88e-05
							1.23e-05
							1.2e-05				0.003906
			0.000141				3.4e-05				0.003523
			8.22e-05								6.12e-05
1.08e-05			0.000105							0.000561	0.000172
5.68e-06						0.000152				9.8e-05	9.61e-05
7.44e-06						9.36e-05				0.000585	0
1.22e-05						5.63e-05				0.000258	1.96e-05
1.42e-05						8.18e-05				0.000117	6.11e-05
					0.00023	4.28e-05		0.000337		0.000335
					3.44e-05	3.34e-05		0.000345
					3.24e-05	0.000144		0.001183
					2.4e-05	7.67e-05		0.000197
	1.19e-06				0.000183			0.000226
	1.05e-06			0.000767	2.89e-05			6.82e-05	3.3e-06
	0			0.000456	0.000211				6.34e-06
	2.89e-07			0.000603	2.91e-05				2.85e-06
	3.59e-07			0.000538	0.000249				5.9e-06
6.81e-06	1.11e-06			0.000542	3.05e-05				6.4e-06
6.04e-05	1.78e-06			0.000695	0.000479				2.98e-06
4.4e-06	2.75e-07			0.000567	0.000183				2.42e-06
				0.000808	2.1e-05				1.75e-05
				0.001099	4.05e-05				3.03e-05
				0.000615					1.25e-06
									2.1e-05
									1.84e-05
									5.38e-06
						1.83e-05
						1.45e-05
						3.2e-06	0.003906
						3.86e-06	0.003523
						0.001081	6.12e-05
	0					0	0.000172
	0					1.55e-07	9.61e-05
	0			0.0002			0
	2.13e-07			0.000187			1.96e-05
	0			0.000202			6.11e-05
	0			0.0001
	1.66e-07			0.000123
	0			0.000123
	0			0.000299
				0.000167
				0.000173					9.67e-05
				0.00028					8.44e-05
				0.000271					0.000136
									0.000106
									0.00013
									0.000112
									9.2e-05
							0.000514
							0.000734
							0.000909
							0.000558
							0.000345
							0.00053
							0.000315		0.002454
							0.000614		4.09e-05
									3.27e-05
		0.000147							4.37e-05
		0.001043							2.21e-05
		0.00017
	2.6e-06	0.000246
	1.05e-06	0.000247
	3.17e-06	0.000128
	1.47e-07	0.000152			0.001381
	1.66e-06	0.000258			0.000994
	2.12e-07				0.00113
	3.91e-06				0.000537		2.77e-06
	4.35e-07				0.000573		2.37e-06
	4.12e-06				0.000385		1.35e-06
	3.53e-07				0.000682		2.38e-06
	6.64e-06				0.000837		7.25e-06
	1.23e-06						2.61e-06
	1.34e-06						2.75e-06
	4.93e-07						1.42e-06
					0.000389
					0.00016
					0.000258
					0.000107
					0.000342
					0.000383
					0.000143
					0.000323
					0.000127
					0.000177
		0.000224
		0.000214
		0.000277
		0.000235
		0.000253
		0.000379
		0.000247
		0.000215
		0.000233
		8.99e-05
		7.82e-05
		0.000386
		3.22e-05
		0.000329
		2.31e-05
		0.000144
		1.84e-05
		4.46e-05

## Sheet: confluency
RKO	C10	HDC9	SW1222	HCT116	HT29	OXCO1	DLD1	DLD1-Cx26KO	SNU1235	Low OXCO1	Low DLD1
49.7559	78.2017	91.0706	95.1355	93.8663	97.1115	39.6755	94.2936	99.5094	55.4825	40.4724	31.6296
41.9083	77.4116	87.5961	93.1992	95.6406	89.7636	27.8023	98.019	92.2096	64.0076	39.2174	21.2154
68.0672	78.6217	78.5938	83.4373	96.7476	94.0891	18.9514	93.8305	79.6158	63.3675	45.6921	19.1841
64.4321	89.6931	88.6391	80.0869	97.5735	94.2135	65.1829	87.7312	97.3564	72.4972	33.3729	30.2666
78.7483	88.1771	83.9962	86.8271	94.4363	93.4742	54.1698	96.3367	98.1758	66.1152	34.2457	7.65228
83.4446	92.0258	74.9561	87.2276	95.7787	93.6562	69.2856	93.2217	97.926	76.9726	32.0236	7.43523
77.29	84.7992	81.0436	88.036	92.5255	92.7052	77.8748	98.8895	65.5945	67.6849	43.0195	16.3124
87.5072	77.6344	84.5444	87.3127	98.2929	97.9298	81.4403	90.5289	70.2259	59.7469	43.9373	12.3714
87.8571	86.5543	91.3864	84.2865	99.5918	96.6007	61.1717	88.3297	97.4476	84.1556	44.5046	23.8339
81.4514	96.0274	83.7318	80.3364	99.0715	95.9839	37.5801	74.0402	90.5403	77.7412	39.6633
76.1276	97.1451	80.3764	85.1551	97.0242	96.1243	28.5225	92.8398	84.5257	62.574	42.5701
90.1581	74.3175	88.364	87.9696	97.1447	89.8624	56.6475	90.8733	89.6015	68.6172	43.6287
	86.903	79.2183	92.4488	97.6395	96.9334	34.6302	94.1193	68.5143	67.5911
	56.5491	84.483	85.8872	97.797	82.4364		96.735	86.084	71.0377
	74.9245	83.152	89.3646	95.6947	78.8357		92.7712	96.7495	80.0682		11.3514
	84.3105	82.0305		98.872	93.9941		98.9246	96.5042	65.8619		9.61609
	73.4554	85.0105		98.3501	67.3847		94.6423	97.575	63.6806		8.52623
82.9983	71.9761	79.1664		97.3846			95.2511		70.6455	14.8762
90.0284	67.4103	83.0296		97.2118		51.133	95.8633		56.3194	22.456
90.6502	90.3198	77.1412		97.8569		57.399	93.9518		50.5753	16.8411
97.5227	94.7369	78.1399	94.1017	95.3827		53.2654	91.2567		59.2159	9.4986
98.0446		71.7773	96.426	98.2773		54.1344	91.0721		66.4909
92.2367		82.8342	98.2696		73.8056	63.9828	93.5993	87.9192
98.2304		86.9274	93.898		77.5963	56.1768	98.7579	93.6886
78.6144		76.0841	85.6487		84.5196	64.0858	84.1862	74.3088
87.0194		78.9867	93.9201		86.7729	59.6755	94.5374	93.7092
	95.4395	79.6749	98.5916		69.9356	47.8023	97.1336	99.5335
	98.5077	86.0626		91.8404	72.8741	38.9514	96.7342	85.5347	74.5003
	94.7811	88.9111		86.4067	77.4139	85.1829	75.3185	96.3192	77.6043
	92.548	69.2715		93.7015	71.8361	74.1698	90.2771	98.9288	80.9437
	96.7037	89.5157		73.0572	81.8119	89.2856	91.2384	92.8665	78.7353
74.2123	95.5181	89.9689		98.2395	84.9354	97.8748	95.4113	82.7782	70.9892
72.4045	94.3356	90.9618		94.5076	81.9675	101.44	94.8273	96.0915	64.5996
91.5226	97.3461	78.8223		80.2391	84.1228	81.1717	95.7783	78.8368	91.6092
58.6716	95.8599	69.8654		98.3192	75.3368	57.5801	97.1737	85.4618	85.2417
87.0007	95.2957	82.2903		98.2807	83.0002	48.5225	91.1346	96.9704	66.5688
84.5043	84.0889	85.7811		95.9904	62.5263	76.6475	74.0402	77.3556	92.9157
	96.0621	79.8737		98.513	68.2461	54.6302			85.4397
	95.2805	66.3547		99.0509	72.2099				85.5446
	95.689	88.1485		96.5176	81.5861				84.1961
		88.7253		98.6881	95.0748				64.9689
		85.5755		58.0982	93.1553				76.9508
		81.5071			78.8685		70.6032		78.8998
		81.398			89.9818	71.133	50.9453		93.7283
		75.9952			82.2594	77.399	58.0154		74.3515
	99.366	90.1867			94.5656	73.2654	66.4421		77.4094
	96.4848	72.6952			71.4111	74.1344	59.988		85.1498
	92.4145	75.5035		83.7929	74.6525	83.9828	59.6092		88.5799
	97.7421	67.5888		82.7827	80.1022	76.1768	85.0868		94.2989
	97.5063	72.7512		76.516	86.9762	84.0858	88.924		72.2549
	97.599	73.2197		88.4262	81.815	76.5487	91.5722
	98.513	76.4294		70.0733	92.1181	75.476	72.3774
	97.612	68.1805		86.5822	77.3907	70.428	78.5389
	98.8068	88.4338		86.364	81.2351	75.7457	74.5266
	98.7858	80.302		67.1577	64.6637	76.0112	72.5472
	99.4427	80.8853		93.2949	67.1139	78.3248	78.6396		58.6575
	96.9776	61.7962		87.6	69.8441	70.2602	93.869		57.0488
	96.2101	52.8942		81.5994	74.6246	72.5402			50.8492
	97.213	65.6128		82.9369	97.0512	69.4015			45.2774
	98.5363	84.3021		71.7106	95.237	69.7192			70.6707
	98.3395	91.8392		80.7247	96.8796				47.7573
	99.5563	82.2349		84.214	97.2725				59.8332
	97.633	53.6358		72.4953	92.3286		89.6435
	97.2111	84.1629		81.8874	83.1039		96.7545
	98.1014	92.5182		80.2227	87.4542		86.3007
	94.9032	77.6985		74.913	94.9017	51.303	99.0307
	96.8235			57.5947	80.8517	37.7414	99.8676
	92.4072			54.3469	65.8989	49.2602	99.6429
	96.7297				68.3365	55.083	97.4373		82.1098
					72.7505	48.693	96.1212		71.9082
					88.4384	59.164	98.3421		54.5162
		78.87			74.498	55.7632	95.2156		80.0476
		71.1796					94.4172
		80.5836					85.4992
	87.2723	70.38					97.3915
	80.8495	76.6319
	84.9194	72.3236
	78.0331	76.5419			91.0324
	81.4156	78.204			96.4397
	77.2015	88.0947			97.7814
	92.7345	79.1634			76.6281		67.7238
	85.799	85.643			92.0834		86.8595
	64.2879	71.7266			92.9409		90.6918
	63.3892	77.6691			94.8952		91.4936
	94.7411	81.6876			95.3869		83.7185
	88.6631	72.0944			98.0316		95.8454
	78.2215	76.746			97.9095		88.0093
	94.4546	57.5699			93.3453		70.5086
	82.7488	66.745			94.0888		92.2974
	97.7783	79.9427					92.0059
	92.1097	87.7754					95.9255
	94.3672	88.8603					96.447
	90.3912	73.2914					97.8794
	88.0779	82.1697					95.9976
	86.2366	70.459			84.161		66.3788
	79.7314	74.8795			54.9698		80.1807
	79.67	88.8348			59.9743		84.8091
	84.174	78.1452			60.6686		86.1431
	86.0691	81.419			70.9393		74.6548
	85.4103	72.4808			73.8621		96.9296
	90.905	77.7573			71.059		97.7405
	65.5456	84.2777			65.3339		95.8927
	81.7814	85.4607			79.063		95.9938
	73.3219	75.6035			60.5095		89.5542
	76.0235	79.768			78.3089		97.1802
	91.7141	72.9809			89.1582		98.5031
	91.1045	80.9116			76.5144		93.0321
	81.5548	68.4811			91.0511		83.3069
	84.8736	70.3846			78.6415		98.3845
	92.2623	70.4464			84.6237		76.7399
	88.3373	79.5162			84.8934		79.5692
	69.8216	68.2518			88.6475		62.5706
	83.8928	78.1994			72.4758		98.4058
	94.9711	83.1928			82.8033		98.6595
	71.122	70.9545			62.524		85.7426
	80.23	75.9502			68.7145		86.8858
	89.7659	74.1531			91.2895		93.6153
	89.5519	77.3457			83.6578		86.9255
	86.5151	67.376			91.4959		78.5004
	83.7284	69.5793			93.4704		80.9856
	71.9528	76.5366			91.5066		87.7449
	86.916	82.589			89.2742		97.7062
	84.7431	72.4182			91.5913		91.7286
	70.0325	93.9102			77.8606		76.0597
	84.972	76.9871			61.0191		97.8794
	87.2116	75.2399			58.6269		86.1431
		79.4857			93.1339		95.8927
		53.2127			86.3632		62.5706
		76.7429			56.1142		78.5004
		76.6174			54.628		76.0597
		80.3005			69.7727
					89.6629
					88.913
					94.8071
					94.0105
					51.5125
		52.1332
		52.9335
		50.8102
		60.2234
		61.182
		46.162
		53.4695
		57.6794
		62.4756
		83.7399
		81.9099
		70.6802
		62.5549
		47.9267
		48.4772
		41.5001
		27.309

## Sheet: % distribution
	0-0.25	0.25-0.50	0.50-0.75	0.75-1.00
RKO	89.0687	7.19848	2.12838	1.60447
C10	56.824	20.6885	12.9865	9.50101
HDC9	50.1551	21.2785	16.3708	12.1956
SW1222	54.4058	29.9682	10.1185	5.50748
HCT116	65.611	18.4479	8.75873	7.18234
HT29	61.5153	21.1726	10.2598	7.05236
OXCO1	60.942	15.4878	10.8193	12.7509
DLD1	56.8094	22.1933	12.1205	8.87674
DLD1-Cx26KO	86.9408	6.9749	3.39071	2.69361
SNU1235	56.1035	18.9488	14.4008	10.547
Low OXCO1	91.3501	4.91289	2.11421	1.62282
Low DLD1	89.7517	5.66798	2.57487	2.00548
