# Supplementary material for: Solute exchange through gap junctions lessens the adverse effects of inactivating mutations in metabolite-handling genes
Source: eLife. 2022 Sep 15;11:e78425. doi: 10.7554/eLife.78425 (PMC9534548; doi:10.7554/eLife.78425)
Supplement: Figure 4—source data 1. [file elife-78425-fig4-data1.xlsx]

## Sheet: Sheet1
DLD1 (acutely mixed)	DLD1 (co-cultured)		HT29 (acutely mixed)	HT29 (co-cultured)
6.82	65.3		3.1	53.2
5.37	65.6		2.6	53.3
	65.9
6.2	44.3		2.3	50.03
5.5	44.2		2.4	50.1
4.1	67.36
9.9	62.4
