# Supplementary material for: Solute exchange through gap junctions lessens the adverse effects of inactivating mutations in metabolite-handling genes
Source: eLife. 2022 Sep 15;11:e78425. doi: 10.7554/eLife.78425 (PMC9534548; doi:10.7554/eLife.78425)
Supplement: Figure 5—source data 1. [file elife-78425-fig5-data1.xlsx]

## Sheet: HCT x HCT-NHE1 pH 7.4 #1
	GFP							SRB
1	1.07092	0.699257	1.08694	0.763006	1.33251	1.3475	0.895044	0.581844	1.32981	0.833938	0.616278	1.44123	1.19059	0.719928
0.75	1.443	0.470573	2.31799	0.77467	0.891427	0.531052	0.695743	0.832417	0.987092	0.913454	0.617224	1.70151	0.980503	0.633199
0.5	0.586433	0.366903	0.781714	0.692943	1.2225	0.299755	0.286049	0.690247	1.1336	0.970419	0.622643	1.46395	1.01164	0.734928
0.25	0.582648	0.182708	1.02011	0.335553	0.372521	0.168528	0.247036	0.804068	1.04759	0.91048	0.623873	1.84894	0.77503	0.683031
0	0.002146	-0.00275	0.003566	0.009583	-0.01197	-0.00108	0.000506	0.611413	0.977203	1.01558	0.582077	1.28224	1.25879	0.77492

## Sheet: HCT x HCT-NHE1 pH 6.6 #1
	GFP							SRB
1	1.12435	0.722868	0.625036	1.08277	0.944986	1.32771	1.13033	0.831208	0.963729	1.01964	0.542562	1.30076	1.2401	0.913135
0.75	2.25717	0.693324	0.881181	0.688829	0.793116	0.453466	0.587677	1.28052	1.08006	1.43041	0.612267	1.06276	0.74441	0.55995
0.5	0.543997	0.297786	0.203669	0.36387	1.75677	0.266877	0.397861	0.811145	1.26257	0.382862	0.75099	1.65244	0.860575	0.896078
0.25	1.34608	0.395809	0.377066	0.543354	0.570136	0.046688	0.371841	1.4896	0.899617	0.897295	0.556106	1.61343	0.268271	0.877242
0	-0.01151	0.00797	-0.0024	-0.01363	0.017759	0.00255	-0.00073	0.964451	0.376132	0.958423	0.831035	1.77951	1.02477	0.946162

## Sheet: HCT x HCT-NHE1 pH 7.4 #2
	GFP							SRB
1	1.08183	0.886254	1.18493	1.0595	1.00437	1.24627	0.992846	0.641316	1.08093	0.972083	0.714195	1.03191	1.27385	0.787963
0.75	1.44424	1.04658	1.45148	1.18824	0.726606	1.43491	0.481461	0.896197	0.564782	1.04297	0.851116	1.07288	1.39204	0.823822
0.5	0.843053	0.369571	0.87526	1.56399	0.183138	1.43673	1.00984	0.793163	0.623397	0.989322	0.920105	0.734031	1.55008	0.95454
0.25	0.767023	0.195641	0.645463	0.405394	0.174989	0.569695	0.237559	0.792303	0.5766	0.961714	0.870358	1.14573	1.29746	0.852678
0	0.002146	-0.00275	0.003566	0.009583	-0.01197	-0.00108	0.000506	0.611413	0.977203	1.01558	0.582077	1.28224	1.25879	0.77492

## Sheet: HCT x HCT-NHE1 pH 6.6 #2
	GFP							SRB
1	1.07664	0.552774	1.15682	1.60208	0.81001	1.13218	1.15328	0.855634	0.975306	1.11742	1.05738	0.962632	1.05527	0.837201
0.75	2.43805	0.560383	0.865308	0.441741	0.589913	1.30133	0.716505	1.44811	0.811317	0.468219	0.166065	0.93955	2.10192	0.759747
0.5	0.925771	0.23631	0.616235	0.918608	0.224664	1.13206	1.04198	1.0259	0.913887	0.412725	0.574637	0.960492	1.96319	0.778457
0.25	0.807854	0.159048	0.149471	0.249341	0.47799	0.563799	0.286585	1.17075	0.696962	0.267331	0.653611	1.14846	1.77422	0.665129
0	-0.01151	0.00797	-0.0024	-0.01363	0.017759	0.00255	-0.00073	0.964451	0.376132	0.958423	0.831035	1.77951	1.02477	0.946162
