# Supplementary material for: Solute exchange through gap junctions lessens the adverse effects of inactivating mutations in metabolite-handling genes
Source: eLife. 2022 Sep 15;11:e78425. doi: 10.7554/eLife.78425 (PMC9534548; doi:10.7554/eLife.78425)
Supplement: Figure 6—source data 1. [file elife-78425-fig6-data1.xlsx]

## Sheet: DLD1 x DLD-ALDOA pH 7.4 gR117
Fraction KO	GFP							SRB
1	1	1	1	1	1			0.136656	0.286721	0.424543	0.158794	0.170245
0.75	1.24157	1.72256	2.01983	1.70151	1.12473			0.794735	0.76477	1.04328	0.890868	0.934586
0.5	0.741063	0.912429	0.744318	0.503424	0.626619			1.14926	0.886721	1.0038	0.990135	1.04713
0.25	0.37974	0.45407	0.603844	0.344136	0.345332			0.941753	0.833062	1.23657	0.878861	0.909259
0	0	0	0	0	0			1	1	1	1	1

## Sheet: DLD1 x DLD-ALDOA pH 7.4 gR119
	GFP							SRB
1	1	1	1	1	1			0.480962	0.283774	0.07128	0.192667	0.06678
0.75	1.63516	1.83101	0.869586	1.00499	1.33889			0.937076	0.949491	0.683391	0.635451	1.08556
0.5	0.83679	0.615558	0.425927	0.508018	0.640622			1.00288	0.926599	0.913149	0.690332	0.872373
0.25	0.515799	0.529591	0.230204	0.345656	0.181644			0.879712	0.818883	0.944637	0.868286	0.96098
0	0	0	0	0	0			1	1	1	1	1

## Sheet: DLD1 x DLD-ALDOA gR119 Cx26 vir
	GFP							SRB
1	1	1	1					0.06678	0.170245	0.059979
0.75	0.428861	1.04849	0.498806					1.01931	0.729956	0.845899
0.5	0.269141	0.580028	0.379791					0.524855	0.899866	1.05456
0.25	0.112138	0.272478	0.153666					0.746982	0.905569	0.965716
0	0	0	0					1	1	1

## Sheet: NCIH x NCIH-ALDOA
1	1	1	1	1				0.082891	0.063047	0.152704	0.311148
0.75	0.820333	1.24299	0.632432	0.819826				0.31881	0.2662	0.460855	0.357737
0.5	0.806512	0.932852	0.373142	0.692467				0.504782	0.342382	0.495726	0.56406
0.25	0.223634	0.391045	0.289531	0.235634				0.651435	0.568301	0.502564	0.642263
0	0	0	0	0				1	1	1	1

## Sheet: RKO x DLD1 ALDO
	GFP
1	1	1	1	1
0.75	0.520228	1.05557	0.797078	0.721597
0.5	0.323039	0.63482	0.25181	0.547693
0.25	0.100183	0.275663	-0.000965	-0.084332
0	0	0	0	0
