# Supplementary material for: Solute exchange through gap junctions lessens the adverse effects of inactivating mutations in metabolite-handling genes
Source: eLife. 2022 Sep 15;11:e78425. doi: 10.7554/eLife.78425 (PMC9534548; doi:10.7554/eLife.78425)
Supplement: Figure 7—source data 1. [file elife-78425-fig7-data1.xlsx]

## Sheet: SW1222 x SW1222-NDUFS pH 7.7
	GFP							SRB
1	1	1	1	1	1	1		0.407671	0.653999	0.389558	0.285468	0.454156	0.288789
0.75	1.11038	2.03751	2.82028	1.45815	1.33057	1.18266		0.634668	0.70653	1.06827	0.82763	0.630909	0.82171
0.5	0.665921	0.893704	1.26805	0.770847	0.67741	0.597236		0.492769	1.02935	1.16429	1.00808	0.828953	0.953093
0.25	0.470795	0.838188	1.14232	0.419999	0.347863	0.356796		0.742192	0.801614	1.42351	1.03794	0.692135	1.02194
0	0	0	0	0	0	0		1	1	1	1	1	1

## Sheet: SW1222 x SW1222-NDUFS pH 7.1
	GFP							SRB
1	1	1	1	1				0.148233	0.106989	0.235	0.12931
0.75	1.51902	0.508609	0.353931	0.448204				0.848702	0.201005	0.369861	0.5948
0.5	0.578022	0.752672	0.589449	0.810337				0.755339	0.632618	0.761389	1.00241
0.25	0.260704	0.15513	0.100974	0.121187				0.186536	0.222385	0.277639	0.673909
0	0	0	0	0				1	1	1	1

## Sheet: NDUFS pH 7.7 siRNA
	GFP							SRB
1	1	1	1	1				0.788914	0.575513	0.478895
0.75	0.473824	0.496882	0.628129	0.447336				0.637963	0.587943	0.576863
0.5	0.377158	0.335576	0.339798	0.490025				0.678189	0.556039	0.773059
0.25	0.125114	0.201458	0.199938	0.153744				0.835822	0.500932	0.723293
0	0	0	0	0				1	1	1

## Sheet: NDUFS pH 7.7 sparse
	GFP							SRB
1	1	1	1	1				0.43231	0.404571	0.081908	0.714444
0.75	0.934849	0.808539	0.806809	0.0938511				0.633755	0.680381	0.466563	0.508578
0.5	0.628575	0.744536	0.205336	0.154303				0.400361	0.462476	0.296008	0.576231
0.25	0.126733	0.030743	0.386389	0.15115				0.255596	0.347238	0.595645	0.433453
0	0	0	0	0				1	1	1	1

## Sheet: NDUFS pH 7.7 hypoxia
	GFP							SRB
1	1	1	1	1				0.376314	0.506666	0.526501	0.685206
0.75	0.75171	0.734478	0.351687	0.410339				0.990609	0.913892	0.79993	0.819362
0.5	0.287152	0.320651	0.17799	0.142375				0.932325	0.901945	0.886627	0.94435
0.25	0.195531	0.193661	0.118129	0.097388				0.978088	0.898011	0.753422	0.765828
0	0	0	0	0				1	1	1	1

## Sheet: RKO x SW1222-NDUFS pH 7.7
1	1	1	1	1	1
0.75	0.681956	0.705492	0.424559	0.146694	0.63892
0.5	0.376755	0.688613	0.517177	0.158782	0.541557
0.25	0.19877	0.264646	0.177383	0.0782039	0.385861
0	0	0	0	0	0

## Sheet: C10 x SW1222-NDUFS pH 7.7
1	1	1	1	1
0.75	0.786429	0.691218	0.783539	0.768795
0.5	0.628906	0.8675	0.632978	0.508599
0.25	0.341069	0.336579	0.525019	0.47284
0	0	0	0	0

## Sheet: NCIH747 x SW1222-NDUFS pH 7.7
	GFP
1	1	1	1
0.75	0.492874	0.671696	0.476272
0.5	0.382856	0.632851	0.473753
0.25	0.321592	0.50285	0.35626
0	0	0	0
