# Supplementary material for: Solute exchange through gap junctions lessens the adverse effects of inactivating mutations in metabolite-handling genes
Source: eLife. 2022 Sep 15;11:e78425. doi: 10.7554/eLife.78425 (PMC9534548; doi:10.7554/eLife.78425)
Supplement: Figure 8—source data 1. [file elife-78425-fig8-data1.xlsx]

## Sheet: Fig8b
	WT DLD1	KO DLD1
repeat1	3.0434	2.2385
repeat2	2.66975	2.03875
repeat3	2.37775	2.14975
repeat4	2.4143	2.268

## Sheet: Fig8c
	WT1	WT2	WT3		KO1	KO2	KO3
Radius um	115.508	101.757	113.631		88.1867	99.3865	69.757
	97.8282	99.0495	111.288		87.4805	87.5726	73.6657
	108.286	104.717	114.003		79.8471	97.2195	77.2708
	106.895	93.6381	112.25		85.1504	101.886	80.6447
	113.119	103.254	101.57		79.1769	99.1124	70.1012
	107.708	101.406	93.5689		74.5299	100.597	76.2355
	97.7157	96.7369	105.616		83.3343	104.608	69.4677
	110.777	97.8182	85.789		88.8903	95.4994	78.838
	108.607	100.389	78.9661		82.5747	88.7141	81.7574
	106.799	98.8702	96.3393		79.2509	99.0927	78.3401
	91.0667	96.5251	108.662		79.1659	103.247	71.0599
	107.215	97.627	101.671		103.256	89.7437	73.6177
	111.87	95.3071	94.0777		74.7973	98.8184	53.552
	109.66	95.9509	92.3917		75.2839	96.5551	77.3951
	106.546	96.6286	81.9202		82.3749	98.9678	76.9593
	112.797	94.8435	109.248		73.7491	92.8403	78.0087
	100.995	99.0955	109.043		77.6442	93.5177	68.7325
	108.457	96.9061	106.31		84.3571	104.075	71.781
	110.123	95.0806	104.136		84.9212	99.7818	72.0185
	105.29	102.959	99.222		88.1477	90.8555	74.7201
	106.575	101.624	106.931		89.2078	95.7662	75.5187
	114.67	98.0336	105.571		84.4725	98.3792	76.2147
	108.566	93.1344	90.979		78.8194	99.3174	83.9346
	107.277	93.4968	116.629		87.9399	96.9051	69.8855
	94.3614	99.0604	113.21		79.8527	86.5473	71.131
	110.169	95.9023	103.73		86.2101	94.8037	77.8417
	110.741	101.238	76.9721		84.1952	100.578	78.0515
	115.037	95.6824	95.2092		82.3738	89.9827	85.7866
	105.069	99.2212	106.094		83.7283	96.1832	80.5219
	110.901	98.5159	100.84		77.9923	111.029	71.1175
	98.9307	108.545	85.522		88.506	99.2671	83.4089
	88.388	95.6746	82.4542		82.3407	90.6414	81.0052
	110.509	94.5306	93.4419		84.2145	101.177	69.832
	107.526	99.8242	89.8141		81.1984	102.247	87.0948
	116.54	102.119	105.737		85.5616	95.1091
	114.942	100.408			75.0448	100.943
	113.986	96.9689			86.5381	92.7734
	110.117	102.563			82.068	96.0061
	114.35	99.8548			84.6845	97.717
	113.175	99.7764			80.6877	100.577
	109.805	100.729			85.5188	101.886
	91.4618	99.9345			85.074	101.751
	110.741	99.9641			87.7419	108.261
	109.785	94.5931			84.9464	101.215
	108.427	101.918			80.2134	98.1222
	105.117	97.2274			83.2095	99.0067
	96.9146	101.857			94.1641	99.5882
	112.407	92.2766			90.4509	106.13
	109.424	97.9651			86.3574	102.839
	104.127	101.759			87.9391	100.739
	109.575	100.817			86.7045	107.41
	104.475	97.5724			86.2744	102.189
	101.277	94.8957			80.2242	100.267
	106.285	94.973			84.8785	97.6208
	102.161	98.2701			83.5574	101.597
	105.987	98.9388			74.4167	101.441
	109.081	98.7262			87.5898	102.808
	110.86	95.1249			80.3542	100.709
	109.191	85.1335			88.8534	97.6944
	104.155	101.102			82.9473	94.9764
	105.451	97.2033			83.1548	91.7121
	108.474	101.66			83.4875	100.518
	93.1792	94.5941			84.1849	96.5635
	93.2873	99.0044			73.579	97.5491
	102.701	99.7579			74.2138	101.141
	105.905	100.756			76.2628	101.236
	110.154	99.5444			86.4271	99.2578
	110.648	97.8191			77.2163	96.6211
	102.587	96.419			80.2786	96.1233
	101.727	101.549			82.3386	97.6993
	110.742	98.9189			76.9026	96.4246
	113.745	98.8915			79.3367	92.8362
	103.296	95.5139			76.0727	107.979
	115.692	102.863			82.971	96.8236
	112.111	102.214			85.4892	96.982
	110.39	97.7875			85.9784	94.326
	110.325	103.478			78.9432	95.3356
	115.269	99.1947			84.1338	95.0259
	110.315	95.072			79.8397	97.5827
	105.438	92.857			91.3734	86.8213
	107.508	93.9183			79.8443	89.8414
	102.996	99.2996			75.7497	91.0012
	100.559	96.416			87.4653	95.2685
	106.4	94.0737			84.65	98.594
	104.171	101.822			80.4682	95.5764
	115.01	102.18			75.0296	87.2713
	102.89	103.641			69.9378	102.98
	108.188	96.5585			83.2266	102.827
	110.483	94.3669			81.9681	92.7639
	98.7464	95.3242			88.5933	103.475
	115.066	97.3021			87.8951	98.0515
	101.995	96.754			85.3133	103.649
	106.471	95.4581			93.6135	104.127
	101.58	101.416			82.0788	102.784
	101.457	100.39			100.721	102.287
	110.387	94.6048			79.9937	101.987
	106.651	94.8532			82.5519	92.9357
	104.684	99.6818			86.6896	99.6478
	108.287	98.9478			78.9893	85.4065
	109.542	99.0946			81.5495	95.4271
	110.59	96.2497			83.8976	93.7592
	104.311	97.9937			81.6886	99.2953
	100.7	102.131			87.4746	95.9813
	108.151	98.8707			87.7135	103.501
	115.05	92.7423			82.1013	101.734
	102.099	102.945			80.2536
	109.191	94.5927			78.1771
	101.264	96.2719			82.4279
	111.712	93.2319			80.247
	100.544	94.0971
	102.086

## Sheet: Fig8d
	Mouse ID	1	3	10	30	11	4		1	3	10	30	11	4
	Flank	Left	Left	Left	Left	Left	Left		Right	Right	Right	Right	Right	Right
Day	2	0	6.45898	41.3698	25.7208	0	0		0	29.7177	34.6698	48.7272	0	0
	5	0	22.0255	69.3234	52.8588	0	40.5849		0	34.4203	40.2998	52.9143	0	30.345
	8	0	29.9713	64.6777	90.859	0	71.9552		0	39.6128	33.8032	70.9853	0	36.02
	11	0	68.5106	74.3484	117.953	0	91.8031		0	34.9346	32.8727	70.3917	0	51.519
	14	0	90.612	92.7109	138.666	0	99.6175		0	29.8283	19.505	54.4392	0	56.0459
	17	35.6528	158.898	111.701	260.495	35.8858	106.685		39.3049	40.3482	23.4715	83.8537	73.1927	67.5644
	20	120.483	327.852	152.99	408.495	70.4804	188.518		45.8261	45.202	41.6216	109.324	160.694	223.783
	23	259.526	470.499	190.633	461.965	94.346	311.87		61.518	38.978	50.3207	100.925	232.391	406.464
	26	383.377	584.728	227.219	576.113	135.546	383.512		78.0832	78.3791	108.317	128.23	288.754	459.15
	29	561.7	615.503	645.725	808.576	160.692	498.481		89.2132	153.814	287.419	149.381	377.672	585.662

## Sheet: Fig8e
Number of clusters
	Threshold 3			Threshold 5			Threshold 7
Mose	Left	Right		Left	Right		Left	Right
ID4	20413.3	12428.3		8811.11	3713.33		4804.44	1631.67
ID10	16475.6	4823.33		10346.7	1833.33		7426.67	890
ID11	12284.5	16512.5		4843.1	6655		2562.07	3712.5
ID30	26450	16220		11426	6888.33		6556	3716.67
ID1	36522	16962.7		15194	5652.24		8398	2705.97
ID30	40550	8298.51		16552	2507.46		8968	1079.1
GFP+ area
	Threshold 3			Threshold 5			Threshold 7
Mose	Left	Right		Left	Right		Left	Right
ID4	3.53327e+06	2.59584e+06		1.29698e+06	768415		566796	327094
ID10	2.64478e+06	1.13623e+06		1.38618e+06	408811		788306	156376
ID11	2.74695e+06	3.31004e+06		1.08767e+06	1.251e+06		392130	607449
ID30	4.35268e+06	2.47198e+06		1.60507e+06	814763		740950	324072
ID1	5.17282e+06	2.68956e+06		2.06186e+06	739958		1.10733e+06	298537
ID30	6.07419e+06	1.58784e+06		1.94936e+06	401594		951933	167487
Tumor area
	Threshold 3			Threshold 5			Threshold 7
Mose	Left	Right		Left	Right		Left	Right
ID4	6.28316e+08	4.48465e+08		6.28316e+08	4.48465e+08		6.28316e+08	4.48465e+08
ID10	5.90557e+08	1.50626e+08		5.90557e+08	1.50626e+08		5.90557e+08	1.50626e+08
ID11	4.92728e+08	6.34398e+08		4.92728e+08	6.34398e+08		4.92728e+08	6.34398e+08
ID30	6.81399e+08	2.86253e+08		6.81399e+08	2.86253e+08		6.81399e+08	2.86253e+08
ID1	1.09862e+09	391706003		1.09862e+09	391706003		1.09862e+09	391706003
ID30	8.05921e+08	1.89231e+08		8.05921e+08	1.89231e+08		8.05921e+08	1.89231e+08
