# Supplementary figures and images for: Solute exchange through gap junctions lessens the adverse effects of inactivating mutations in metabolite-handling genes
Source: eLife journal article supplement (doi:10.7554/elife.78425), 2022-09-15

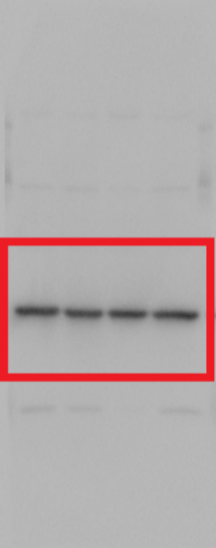

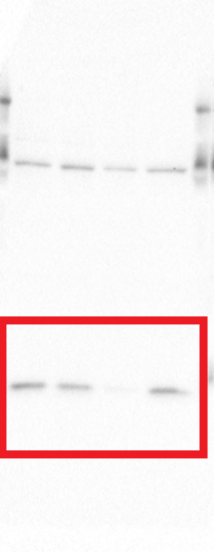



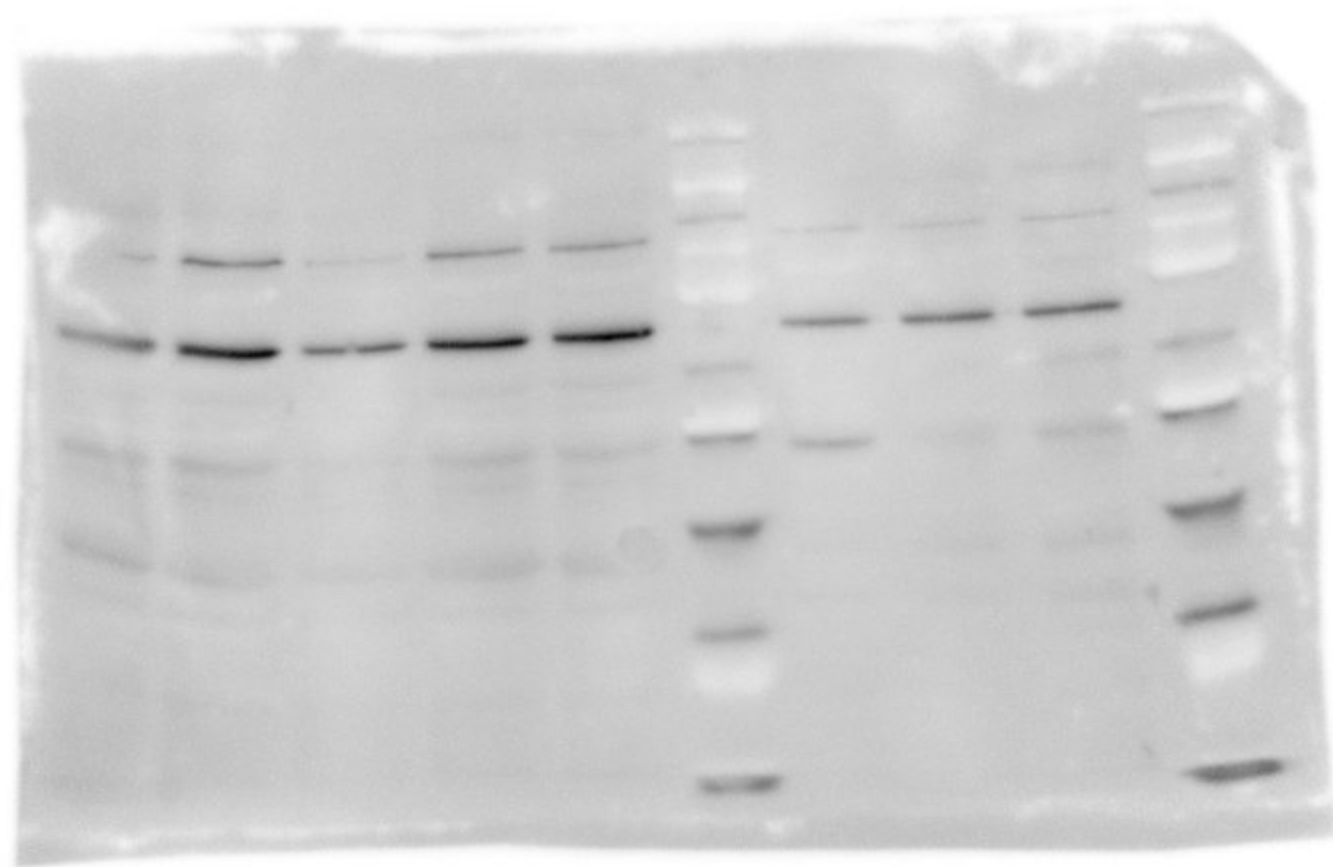

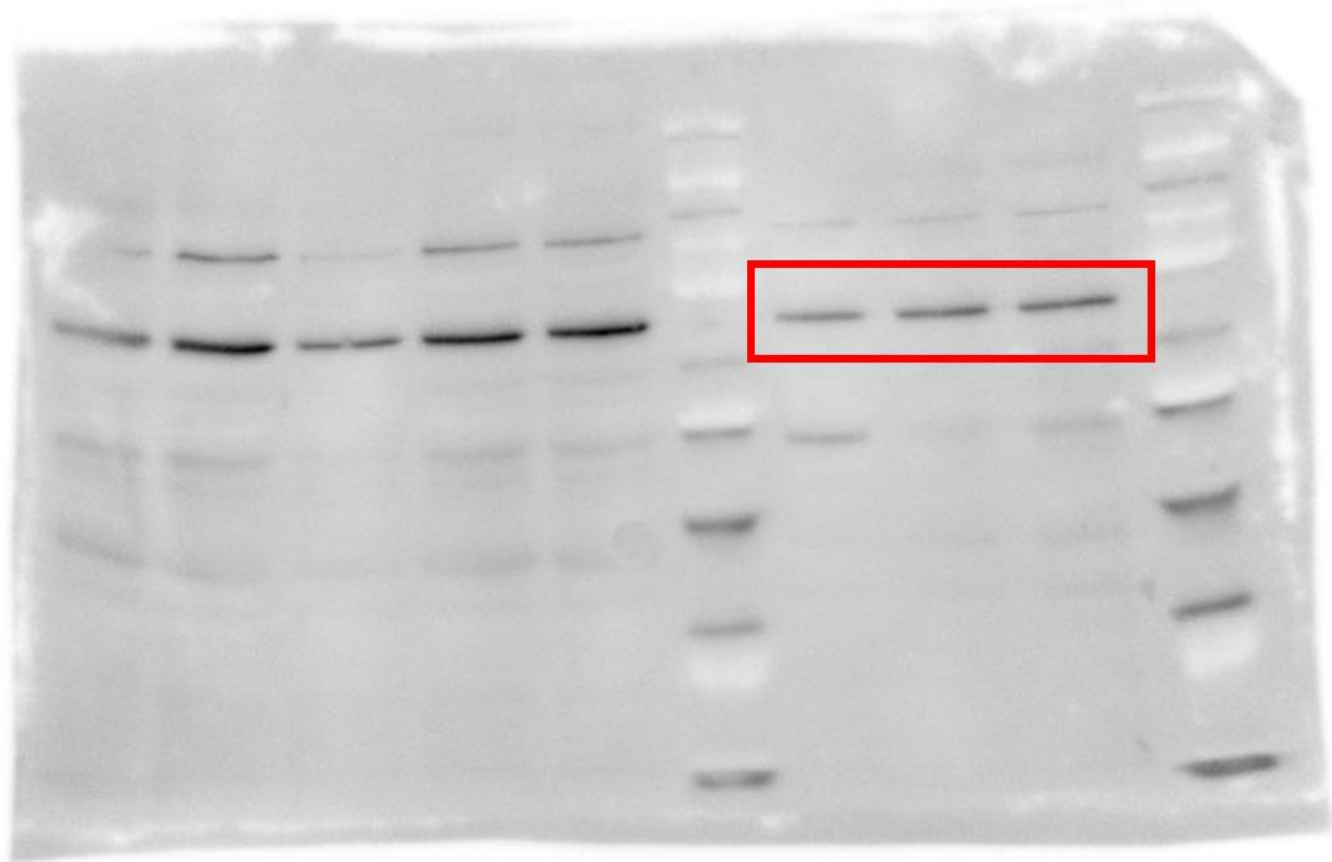

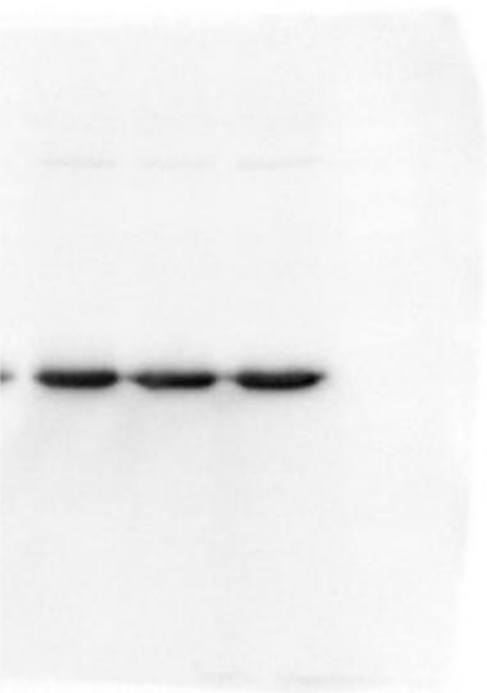

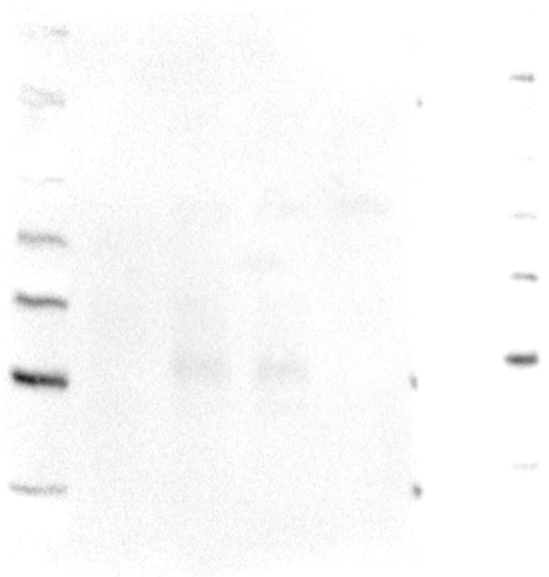

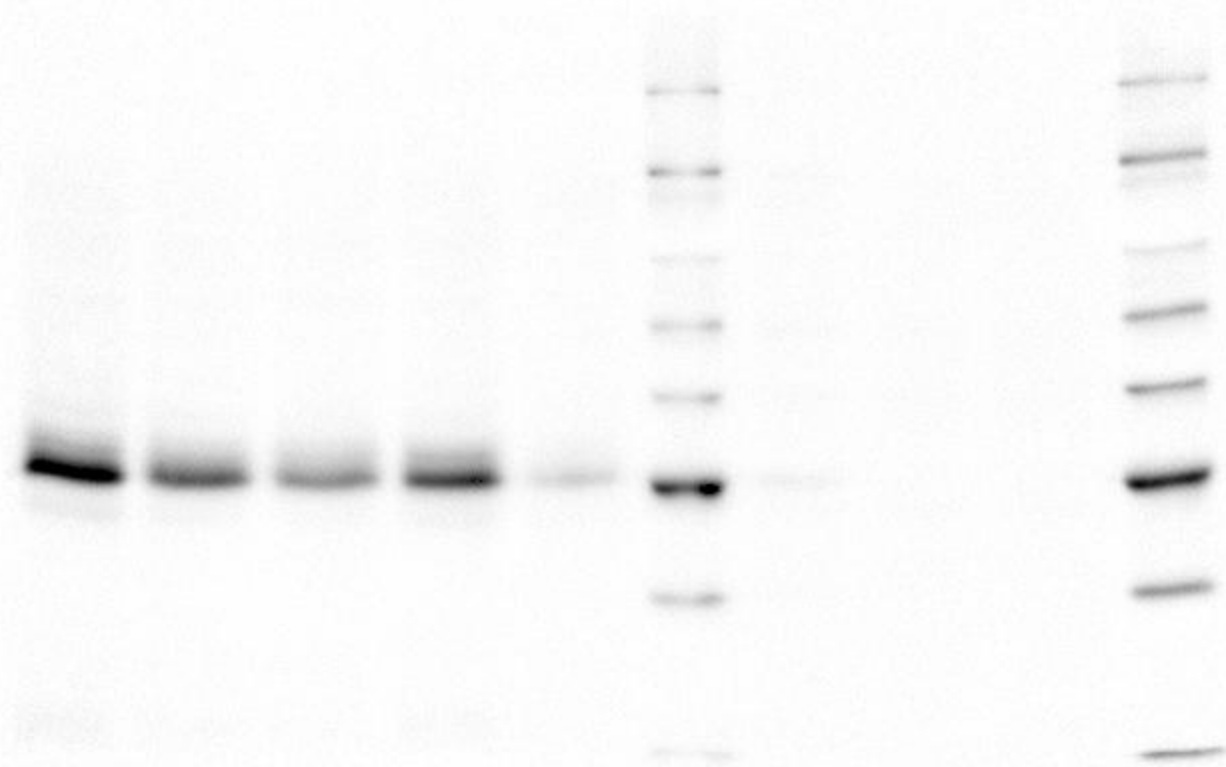

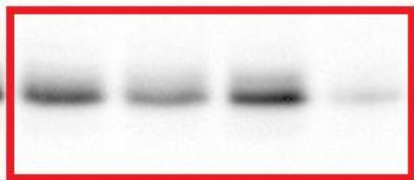

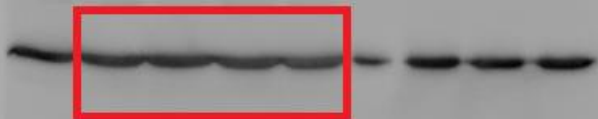

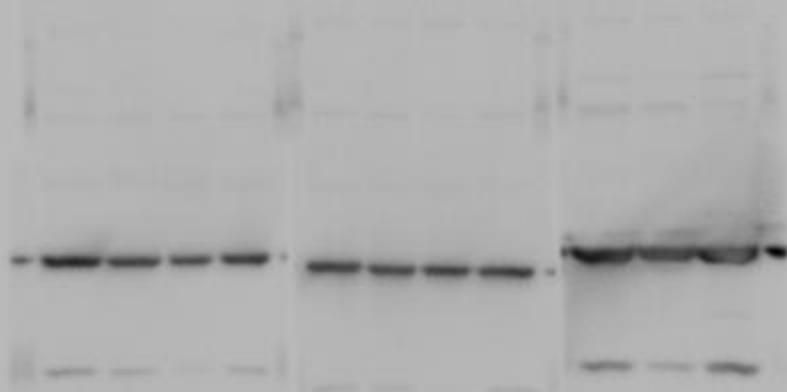

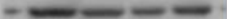

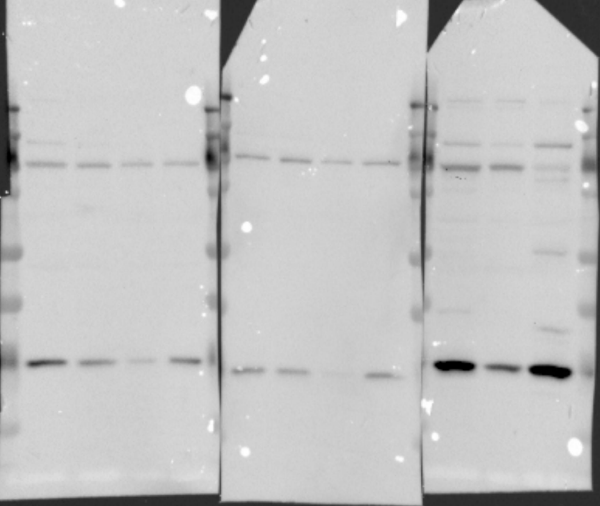

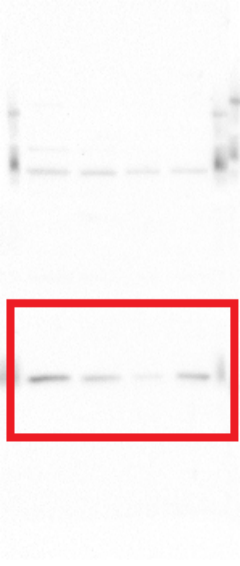

Supplement: fig2-figsupp1-data1 [file elife-78425-fig2-figsupp1-data1-v2.zip]

Cx43

75 -

50 -

37 -

25 -

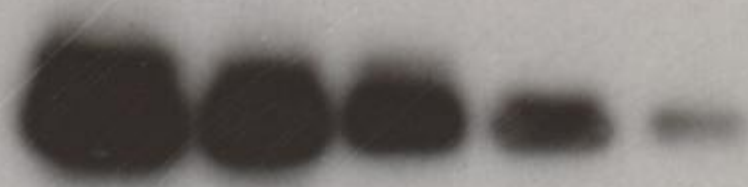

Cx43

75 -

50 -

37 -

25 -

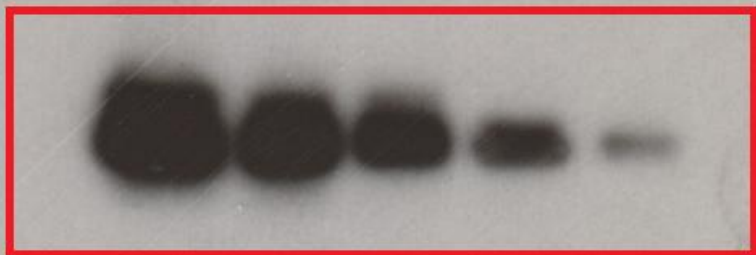

Supplement: fig2-figsupp2-data1 [file elife-78425-fig2-figsupp2-data1-v2.zip]

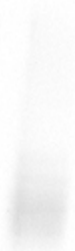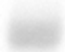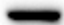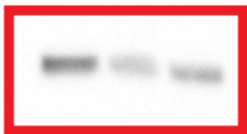

•

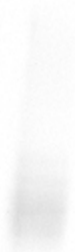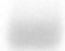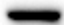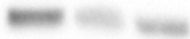

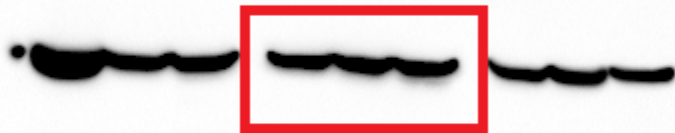

Supplement: fig6-figsupp3-data1 [file elife-78425-fig6-figsupp3-data1-v2.zip]
